# Supplementary material for: Discrete Cu(i) complexes for azide–alkyne annulations of small molecules inside mammalian cells
Source: PubMed Central journal article supplement (PMC5892125; doi:10.1039/c7sc04643j), 2018-01-15
Supplement: SC-009-C7SC04643J-s001.pdf [file SC-009-C7SC04643J-s001.pdf]

## ELECTRONIC SUPPLEMENTARY INFORMATION

### Discrete Cu(I) Complexes for Azide-Alkyne Annulations of Small Molecules inside Mammalian Cells

Joan Miguel-Ávila,<sup>[a]‡</sup> María Tomás-Gamasa,<sup>[a]‡</sup> Andrea Olmos,<sup>[b]</sup> Pedro J. Pérez,<sup>\*[b]</sup> and José L. Mascareñas<sup>\*[a]</sup>

<sup>[a]</sup>Centro Singular de Investigación en Química Biolóxica e Materiais Moleculares (CIQUS) and Departamento de Química Orgánica, Universidade de Santiago de Compostela, 15782 Santiago de Compostela (Spain)

<sup>[b]</sup>Laboratorio de Catálisis Homogénea, Unidad Asociada al CSIC, CIQSO-Centro de Investigación en Química Sostenible, Departamento de Química, Universidad de Huelva Campus de El Carmen s/n, 21007 Huelva (Spain)

## Table of Contents

- S1. General information for chemical experiments
- S2. Experimental procedures and data
- S3. Spectroscopy studies on substrate 1 and product 3
- S4. Catalytic CuAAC experiments under biological relevant conditions
  - Selected in vitro experiments
- S5. Quantification by HPLC-UV
- S6. Spectroscopic analysis of the copper complexes
  - UV-Vis, NMR and EPR experiments
- S7. NMR spectra
- S8. General information for biological experiments
- S9. CuAAC experiments in living cells
- S10. Cell viability
- S11. ICP analysis
- S12. Flow cytometry studies
- S13. Quantification of the reaction inside living cells
- S14. References

## S1. General information for chemical experiments

Synthetic preparative procedures were performed under an atmosphere of dry nitrogen using vacuum-line and standard Schlenk techniques, unless otherwise indicated. The solvents for organic synthesis were of reagent grade unless otherwise noted. Dry solvents were directly purchased from Aldrich and used without further purification. *N,N*-dimethylformamide and trifluoroacetic acid were purchased from Scharlau. Water was deionized and purified on a *Millipore Milli-Q Integral* system.

Chemicals were purchased from *Sigma Aldrich*, *Alfa Aesar*, *Fluka* or *Acros Organics* and used without further purification.

The copper promoted catalytic reactions were carried out without particular precautions to extrude moisture or oxygen, and open to air, except when noted otherwise.

Chromatographic purification of products was accomplished using flash column chromatography on *Merck Geduran Si 60* (40 – 63  $\mu\text{m}$ ) silica gel (normal phase) or by reversed-phase high-performance liquid chromatography (RP-HPLC). Thin layer chromatography (TLC) was performed on *Merck 60* (silica gel F<sub>254</sub>) plates and components were visualized by observation under UV, using staining solutions of  $\text{KMnO}_4$  or *p*-anisaldehyde.

Concentration refers to the removal of volatile solvents via distillation using a rotary evaporator *Büchi R-210* equipped with a thermostated bath *B-491*, a vacuum regulator *V-850*, and a vacuum pump *V-700*, followed by residual solvent removal under high vacuum.

$^1\text{H}$  NMR (300 MHz) spectra were recorded at room temperature on a *Varian Mercury 300 MHz* spectrometer and  $^1\text{H}$  NMR (500 MHz) spectra were recorded at room temperature on a *Bruker DRX-500* spectrometer.  $^{13}\text{C}$  NMR (125 MHz) spectra were recorded on a *Bruker DRX-500* spectrometer.  $^{31}\text{P}$  NMR (202 MHz) spectra were recorded on a *Bruker DRX-500* spectrometer. The spectra were calibrated to the residual solvent peak, if possible. As an external reference triphenyl phosphate (-18 ppm) was used for  $^{31}\text{P}$  NMR spectra. Multiplicities are abbreviated as follows: s = singlet, d = doublet, t = triplet, q = quartet, m = multiplet, br = broad and combinations of these.

NMR spectra were analyzed using *MestreNova*© NMR data processing software ([www.mestrelab.com](http://www.mestrelab.com)). The chemical shifts ( $\delta$ ) are given in ppm and the coupling constants (*J*) in Hz.

EPR measurements were performed with a *Bruker EMX* at a temperature of 120 K.

Fluorescence measurements were performed using a *Horiba FluoroMax*®-3 Spectrophotometer with the following settings: increment 1.0 nm, averaging time 0.2 s, excitation slit width 2.0 nm, emission slit width 2.0 nm.

UV measurements were performed using a *Jasco V-670* spectrometer.

The evolution of the reactions was studied by fluorescence using a *Tecan infinite F200Pro* microplate reader, with a gain of excitation of 48%.

Electrospray Ionization Mass Spectrometry (ESI/MS) was performed with a *Bruker Amazon IT/MS* using direct injection of a solution of the compound into the MS.

Mass spectra were acquired using electrospray (ESI) and were recorded at the CACTUS facility of the University of Santiago de Compostela.

Analytical HPLC was performed on an *Agilent 1260 Infinity II* coupled to an *Agilent Technologies 6120 Quadrupole LC-MS* using a flow rate of 0.35  $\text{mL min}^{-1}$  at room temperature. The initial conditions for the HPLC system were:  $\text{H}_2\text{O}/\text{MeCN}$  (50/50) followed by a gradual change over 35 min to  $\text{H}_2\text{O}/\text{MeCN}$  (0/100). The chromatogram was recorded via UV absorption at  $\lambda = 254$  nm.

## S2. Experimental procedures and data

9-(Azidomethyl)-anthracene (**1**),<sup>1</sup> 1-(9-anthracenylmethyl)-1*H*-1,2,3-triazole-4-methanol (**2**),<sup>2</sup> 3-4-{{bis[[1-(1,1-dimethylethyl)-1*H*-1,2,3-triazol-4-yl]methyl]amino}methyl}-1*H*-1,2,3-triazole-acetic acid (BTAA **L1**), 4-{{bis[[1-(phenylmethyl)-1*H*-1,2,3-triazol-4-yl]methyl]amino}methyl}-1*H*-1,2,3-triazole-1-ethanol (BBTE **L2**), 3-4-{{bis[[1-(1,1-dimethylethyl)-1*H*-1,2,3-triazol-4-yl]methyl]amino}methyl}-1*H*-1,2,3-triazole-1-ethanol (BTTE **L3**),<sup>4</sup> (2-carboxiethyl)diphenyl(pyren-1-ylmethyl)phosphonium bromide,<sup>5</sup> [Cu{BrPPh<sub>2</sub>(OPh-2-OMe)}] (**C4**),<sup>6</sup> bis(1,3-di(adamantan-1-yl)-1,3-dihydro-2*H*-imidazol-2-ylidene)copper ([Cu(IAd)<sub>2</sub>][PF<sub>6</sub>]) (**C3**)<sup>7</sup> and N-[(tris(3,5-dimethyl-1-*H*-pyrazol-1-yl)methyl)] [Cu(NCMe)(Tpa\*)][PF<sub>6</sub>] (**C1**)<sup>8</sup> were synthesized according to literature procedures and spectroscopic data are in agreement with the bibliographic ones.

### 2.1 Synthesis of ligands L1-L3

BTAA (**L1**), BBTE (**L2**), and BTTE (**L3**) were prepared following the synthetic route shown in Scheme S1.

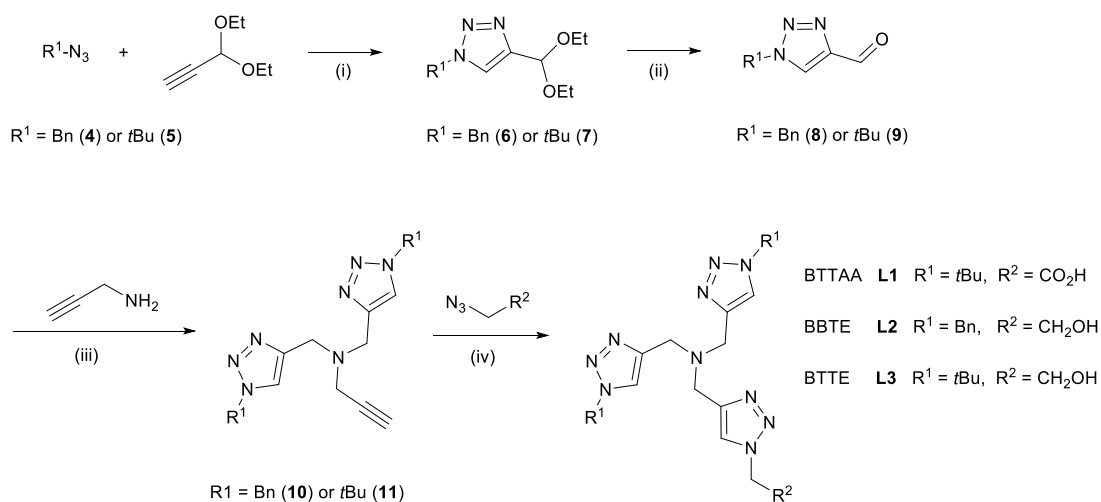

**Scheme S1.** Synthesis of the ligands **L1-L3**. Reagents and conditions: (i) **4** or **5** (1.15 equiv), 3,3-diethoxyprop-1-yne (1.0 eq), H<sub>2</sub>O-*t*BuOH (1:1), NaHCO<sub>3</sub> (1.4 equiv), CuSO<sub>4</sub>·5H<sub>2</sub>O (5 mol%), sodium ascorbate (20 mol%), 12 h, room temperature, 95%; (ii) **6** or **7** (1.0 equiv), trifluoroacetic acid (2.3 equiv), dichloromethane, under nitrogen atmosphere, 5 h, room temperature, 85%; (iii) **8** or **9** (2.2 equiv), prop-2-yn-1-amine (1.0 equiv), Na(AcO)<sub>3</sub>BH (2.5 equiv), 1,2-dichloroethane, 40 h, room temperature, 84%; (iv) **10** or **11** (1.0 equiv), 2-azidoethanol (1.5 equiv), CuSO<sub>4</sub>·5H<sub>2</sub>O (5 mol%), sodium ascorbate (20 mol%), 24 h, room temperature, 90%.

#### BBTE (**L2**):

<sup>1</sup>H-NMR (CDCl<sub>3</sub>, 300 MHz): δ (ppm) = 7.80 (s, 1H, CH=C), 7.62 (s, 2H, 2xCH=C), 7.36–7.28 (m, 6H, 6xArH), 7.23 (dd, 4H, 4xArH), 5.49 (s, 4 H, 2xAr-CH<sub>2</sub>), 4.45 (t, 2H, N-CH<sub>2</sub>-CH<sub>2</sub>-OH), 4.01 (t, 2H, N-CH<sub>2</sub>-CH<sub>2</sub>-OH), 3.72 (s, 6H, 3xCH<sub>2</sub>-N).

<sup>13</sup>C NMR (CDCl<sub>3</sub>, 126 MHz): δ (ppm) = 144.3 (2xN-CH=C), 143.7 (N-CH=C), 134.7 (ArC), 129.1 (ArC), 128.7 (ArC), 128.0 (ArC), 124.8 (N-CH=C), 123.8 (2xN-CH=C), 60.9 (N-CH<sub>2</sub>-CH<sub>2</sub>-OH), 54.1 (2xAr-CH<sub>2</sub>), 52.7 (N-CH<sub>2</sub>-CH<sub>2</sub>-OH), 47.5 (N-CH<sub>2</sub>), 46.9 (2xN-CH<sub>2</sub>).

HRMS: Calculated for: C<sub>25</sub>H<sub>29</sub>N<sub>10</sub>O: 485.2448; found: 485.2510.

## 2.2 Synthesis of ligand L4

**{4-{2-[4-{{bis[1-(*tert*-Butyl)-1H-1,2,3-triazol-4-yl]methyl}amino)methyl]-1H-1,2,3-triazol-1-yl}ethoxy}-4-oxobutyl}triphenylphosphonium bromide (BTTE-P L4)**

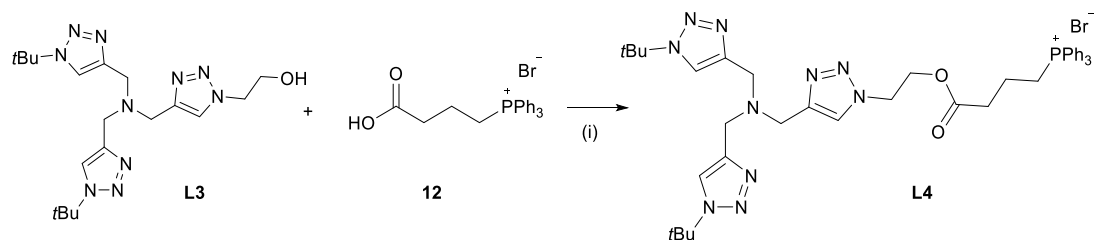

**Scheme S2.** Synthesis of the ligand L4. Reagents and abbreviations: (i) L3 (1.0 equiv), (3-carboxypropyl)triphenylphosphonium bromide **12** (1.0 equiv), EDC (2.5 equiv), DMAP (2.0 equiv), *N,N*-dimethylformamide, 12 h, room temperature, 55%. EDC = 1-Ethyl-3-(3-dimethylaminopropyl)carbodiimide; DMAP = 4-Dimethylaminopyridine.

(3-Carboxypropyl)triphenylphosphonium bromide **12** (94.0 mg, 0.22 mmol, 1.0 equiv) was dissolved in *N,N*-dimethylformamide (2 mL). 1-Ethyl-3-(3-dimethylaminopropyl)carbodiimide (EDC) (104.0 mg, 0.54 mmol, 2.45 equiv), BTTE (**L3**) (91.6 mg, 0.22 mmol, 1.0 equiv) and 4-dimethylaminopyridine (52.0 mg, 0.44 mmol, 2.0 equiv) were subsequently added to the solution. The reaction mixture was left stirring overnight and the solvent was removed under reduced pressure. The crude was purified by flash chromatography on silica gel using DCM / MeOH 9.5:0.5 as eluent. The product **L4** was obtained as a white solid (102 mg, 55%).

$R_f = 0.3$  (DCM / MeOH 9:1) staining  $\text{KMnO}_4$ .

**$^1\text{H}$  NMR** ( $\text{CDCl}_3$ , 500 MHz):  $\delta$  (ppm) = 8.11 (s, 1H, N-CH=C), 7.89 (s, 2H, 2xN-CH=C), 7.81-7.71 (m, 9H, 9xArH), 7.64 (td, 6H,  $^3J = 7.9$ ,  $^4J = 3.5$  Hz, 6xArH), 4.65 (t, 2H,  $^3J = 5.2$  Hz, N-CH<sub>2</sub>-CH<sub>2</sub>-OH), 4.46 (t, 2H,  $^3J = 5.2$  Hz, N-CH<sub>2</sub>-CH<sub>2</sub>-OH), 3.81 (ddd, 2H,  $^2J = 16.5$ ,  $^3J = 8.6$ ,  $^4J = 4.9$  Hz, P-CH<sub>2</sub>-CH<sub>2</sub>), 3.70 (s, 2H, N-CH<sub>2</sub>), 3.67 (s, 4H, 2xN-CH<sub>2</sub>), 2.82 (t, 2H,  $^3J = 6.3$  Hz, CH<sub>2</sub>-CH<sub>2</sub>-CO), 1.90-1.77 (m, 2H, CH<sub>2</sub>-CH<sub>2</sub>-CH<sub>2</sub>), 1.60 (s, 18H, 6xCH<sub>3</sub>).

**$^{13}\text{C}$  NMR** ( $\text{CDCl}_3$ , 126 MHz):  $\delta$  (ppm) = 172.2 (CO), 144.0 (N-CH<sub>2</sub>=C), 143.3 (2xN-CH<sub>2</sub>=C), 135.1 (d,  $^4J = 3.1$  Hz, ArC), 133.6 (d,  $^2J = 10.6$  Hz, ArC), 130.5 (d,  $^3J = 13.1$  Hz, ArC), 125.1 (N-CH=C), 121.1 (2xN-CH=C), 118.0 (d,  $J = 86.3$  Hz, ArC), 62.8 (N-CH<sub>2</sub>-CH<sub>2</sub>-OH), 59.2 (2xC-CH<sub>3</sub>), 49.0 (N-CH<sub>2</sub>-CH<sub>2</sub>-OH), 47.6 (N-CH<sub>2</sub>), 47.2 (2xN-CH<sub>2</sub>), 33.1 (d,  $^2J = 18.8$  Hz, CH<sub>2</sub>-CH<sub>2</sub>-CH<sub>2</sub>), 30.0 (6xCH<sub>3</sub>), 21.5 (d,  $J = 52.0$  Hz, CH<sub>2</sub>-CH<sub>2</sub>-P), 17.9 (d,  $^3J = 2.5$  Hz, CH<sub>2</sub>-CH<sub>2</sub>-CO).

**$^{31}\text{P}$  NMR** ( $\text{CDCl}_3$ , 202 MHz):  $\delta$  (ppm) = 22.6.

**HRMS:** Calculated for  $\text{C}_{41}\text{H}_{52}\text{N}_{10}\text{O}_2\text{P}^+$ : 747.4007; found: 747.4007.

## 2.3 Synthesis of complex Cu-BTTE PF<sub>6</sub> (**C5**)

A solution of the ligand **L3** (246 mg, 0.59 mmol, 1.0 equiv) in 15 mL of methanol was added via cannula over a solution of tetrakis(acetonitrile)copper(I) hexafluorophosphate (220 mg, 0.59, 1.0 equiv) in 25 mL of methanol. After a few minutes, formation of white precipitate was observed. The mixture was stirred for two hours at room temperature. Methanol was filtered off and the solid was washed with 10 mL of methanol and 10 mL of diethyl ether. The solid was dried under vacuum. Cu-BTTE PF<sub>6</sub> (**C5**) was isolated as a white solid (260 mg, 71%).

**$^1\text{H}$  NMR** ( $\text{DMSO-d}_6$ , 500 MHz):  $\delta$  (ppm) = 8.34 (s, 2H, 2xN-CH=C), 8.16 (s, 1H, N-CH=C), 5.07 (t, 1H,  $^3J = 5.3$  Hz, OH), 4.42 (t, 2H,  $^3J = 4.9$  Hz, N-CH<sub>2</sub>-CH<sub>2</sub>-OH), 3.85 (brs, 6H, 3xN-CH<sub>2</sub>), 3.78 (brs, 2H, N-CH<sub>2</sub>-CH<sub>2</sub>-OH), 1.60 (s, 18H, 6xCH<sub>3</sub>).

$^{13}\text{C}$  NMR (DMSO- $d_6$ , 125 MHz):  $\delta$  (ppm) = 144.0 (2xN-CH=C), 124.7 (N-CH=C), 121.5 (3xN-CH=C), 60.3 (N-C-CH $_3$ ), 59.5 (3xN-CH $_2$ ), 53.0 (N-CH $_2$ -CH $_2$ -OH), 47.0 (N-CH $_2$ -CH $_2$ -OH), 29.2 (6xCH $_3$ ).

**Elemental analysis:** Calc. (C $_{19}$ H $_{32}$ CuF $_6$ N $_{10}$ OP) 36.51 C, 5.16 H, 22.41 N; found: 36.86 C, 5.15 H, 22.12 N.

### S3. Spectroscopy studies on substrate 1 and product 3

For the UV-Vis spectroscopic studies, solutions of the substrates 1 and 3 (5 mM in DMSO) were freshly prepared and diluted with 2 mL H $_2$ O into a quartz Hellma® fluorescence cuvette with a pathlength 10x10 mm, chamber volume 3.5 mL (final concentration: 100  $\mu\text{M}$ ).

The samples were analyzed in a *Jasco V-630* UV-Vis spectrophotometer at 25 °C. UV-Vis analyses were performed in the interval of 300-800 nm.

For the fluorescence measurements, solutions of the compounds 1 and 3 (5 mM in DMSO) were freshly prepared and diluted with water into quartz Hellma® fluorescence cuvette with a path length 10x10 mm, chamber volume 3.5 mL (final concentration: 20  $\mu\text{M}$ ).

The samples were analyzed in a *Hoiba FluoroMax-3* fluorescence Spectrophotometer at 25 °C. The solutions of substrates were excited at 367 nm and the emission spectrum was recorded in the interval 355-700 nm.

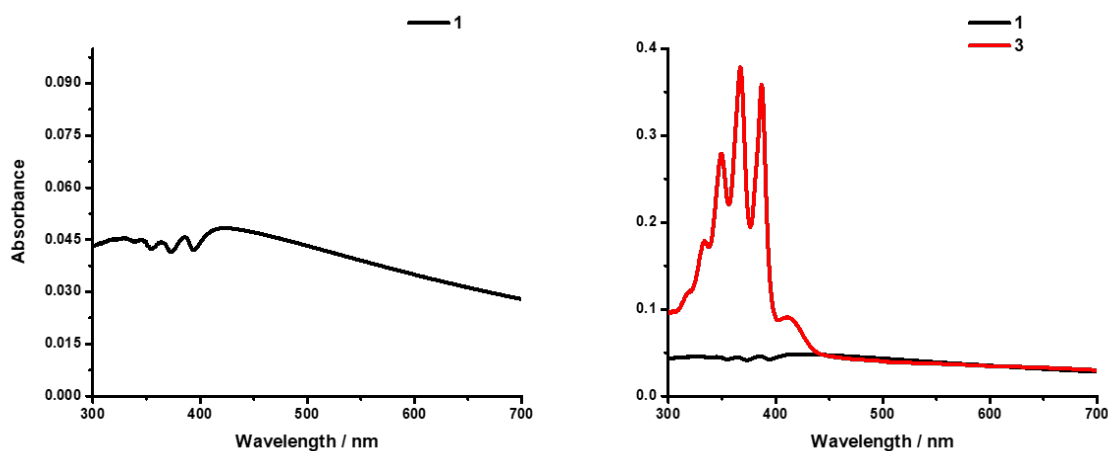

Figure S1. Comparison of UV/Vis absorption spectra of 1 (100  $\mu\text{M}$ , black) and 3 (100  $\mu\text{M}$ , red) in H $_2$ O (2 mL).

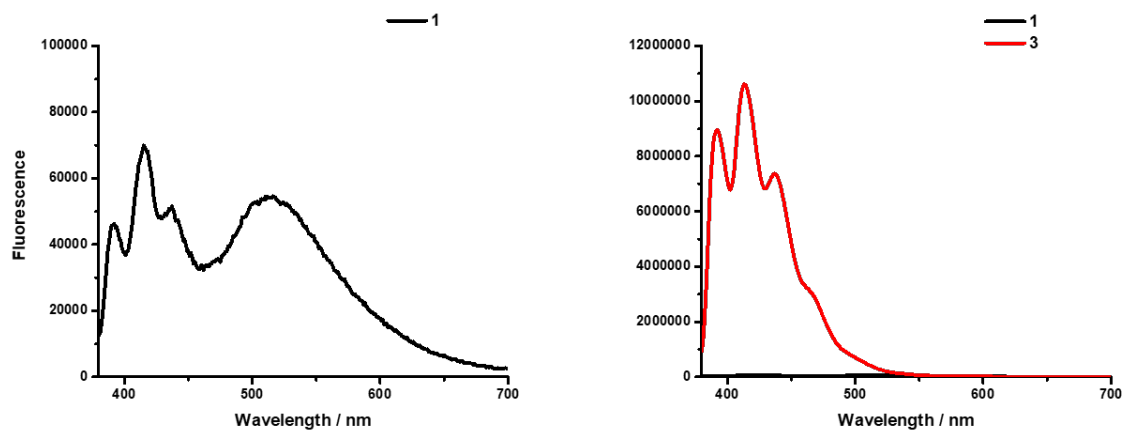

Figure S2. Comparison of fluorescence spectra of 1 (20  $\mu\text{M}$ , black, no emission) and 3 (20  $\mu\text{M}$ , red,  $\lambda_{em}$  = 515 nm) in H $_2$ O (2 mL).

#### S4. Catalytic CuAAC experiments under biological relevant conditions

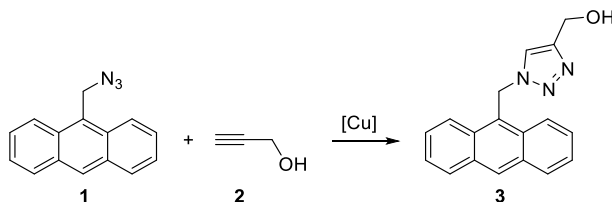

**Scheme S3.** CuAAC reaction between anthracenyl azide **1** and propargyl alcohol **2**.

The studies on the catalytic copper azide-alkyne cycloaddition of 9-(azidomethyl)-anthracene **1** and propargyl alcohol **2** under biologically relevant conditions were performed in a microplate of 96 wells.

##### Reaction with *in situ* prepared Cu(I) complexes using L1-L4 ligands, and with preformed Cu(I) complexes C1-C5

A fresh solution of CuSO<sub>4</sub> (12.5  $\mu$ L, 10 mM in H<sub>2</sub>O) was added to a fresh solution of the ligand (12.5  $\mu$ L, 20 mM in H<sub>2</sub>O and 5% DMSO, 2.0 equiv) in an eppendorf tube of 500  $\mu$ L containing 25  $\mu$ L of milliQ water (with **L2**, solubilization required a little heating). The mixture was stirred for 10 min at room temperature.

A stock mixture containing the reactants was prepared in a eppendorf tube by mixing a fresh solution of azide **1** (3.91  $\mu$ L, 50 mM, DMSO) and a fresh solution of alkyne **2** (7.82  $\mu$ L, 50 mM, H<sub>2</sub>O), in 1688.27  $\mu$ L of the corresponding solvent (water or PBS).

87  $\mu$ L of this mixture was poured into the reaction well of the plate, and mixed with the Cu(II) containing solution (3  $\mu$ L, 2.5 mM, 0.75 equiv). Finally, sodium ascorbate was added (10  $\mu$ L, 25 mM, H<sub>2</sub>O) to start the reaction, which was carried out under air at room temperature.

In case of the preformed Cu(I) complexes, a fresh solution of the complexes **C1-C5** (2.5 mM in DMSO) was freshly prepared. Then, 3  $\mu$ L of this solution was added to the plate well containing the mixture with both substrates (87  $\mu$ L) and diluted in the chosen solvent (3  $\mu$ L of water or PBS, or the sodium ascorbate water solution). The experiments were carried out at 25°C or 37°C.

Final concentrations in the reaction mixtures: 100  $\mu$ M azide **1**, 200  $\mu$ M alkyne **2**, 75  $\mu$ M copper, 2.5 mM sodium ascorbate (when present).

The results were analyzed by fluorescence measurements in a microplate reader (*Tecan infinite F200Pro*). Fluorescence data were obtained by using an excitation wavelength of 360 nm and recorded at 465 nm. Every measured value is the mean value of three aliquots.

Calibration experiments were performed in a 96 wells plate by addition of increasing quantities of a fresh solution of 1-(9-anthracenylmethyl)-1H-1,2,3-triazole-4-methanol **3** (1 mM or 5mM in DMSO) in milliQ water. Higher concentration results in the precipitation of the triazole **3**. The experiments were performed by triplicate, and measured in the fluorescence microplate reader (excitation: 360 nm, emission: 465 nm). The fluorescence results were processed with OriginPro 2016 to obtain the calibration equation and applied to quantify the fluorescence of the *in vitro* experiments.

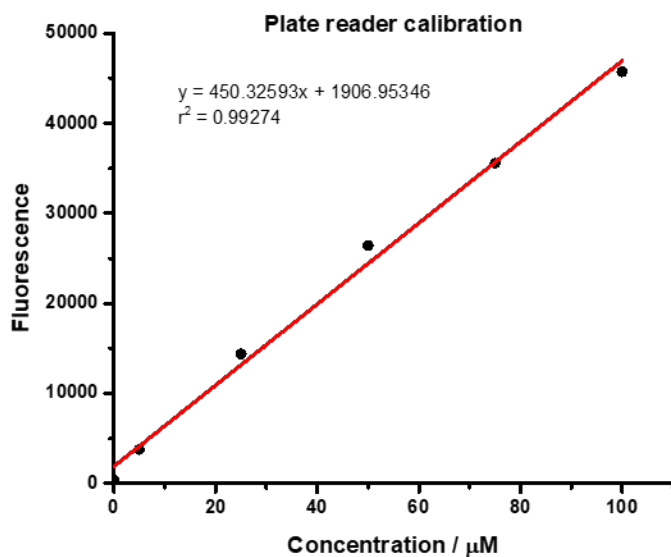

Figure S3. Standard curve of triazole 3. Fluorescence intensity ( $\lambda_{\text{ex}} = 360 \text{ nm}$ ,  $\lambda_{\text{em}} = 465 \text{ nm}$ ) at different concentrations. Linear regression curve for 0–100  $\mu\text{M}$  is shown.

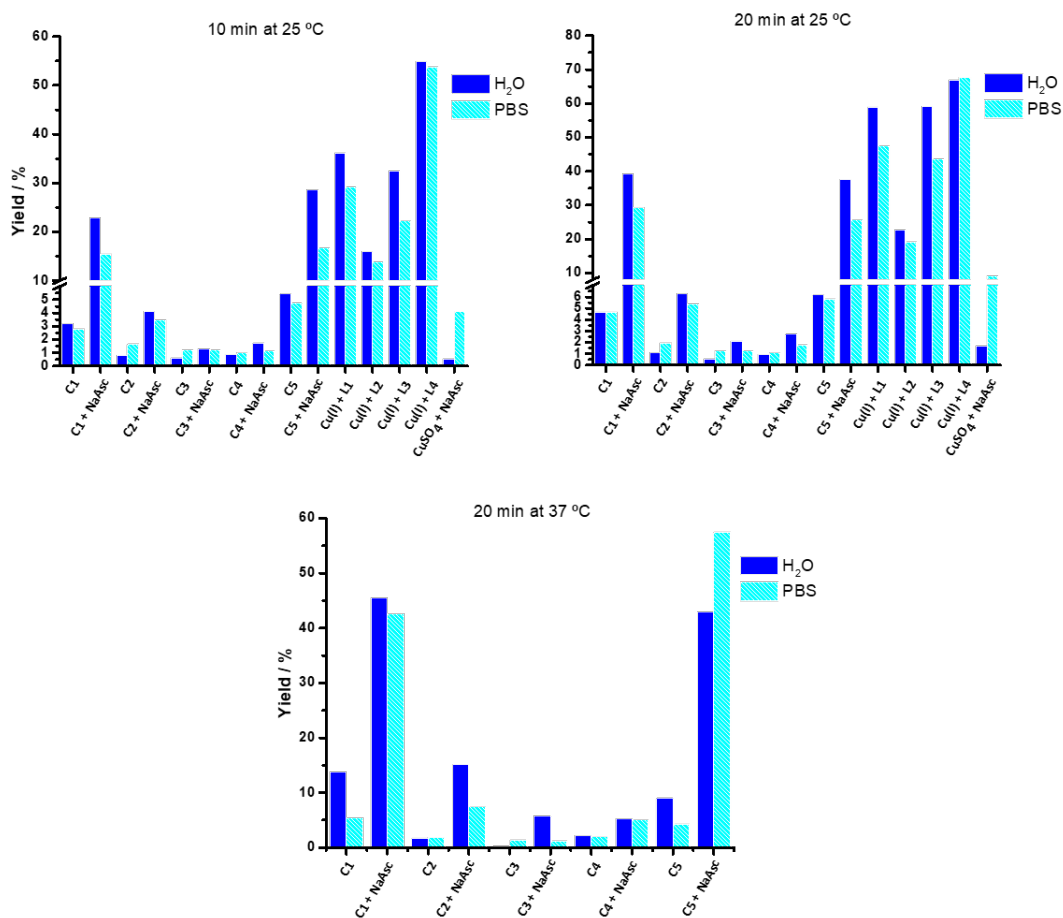

Figure S4. Summary of the results obtained for the CuAAC carried out in vitro at the indicated T<sup>a</sup>. **Cu(I) + Ln** refers to the in situ preformed complex with selected ligand Ln, CuSO<sub>4</sub> and NaAsc.



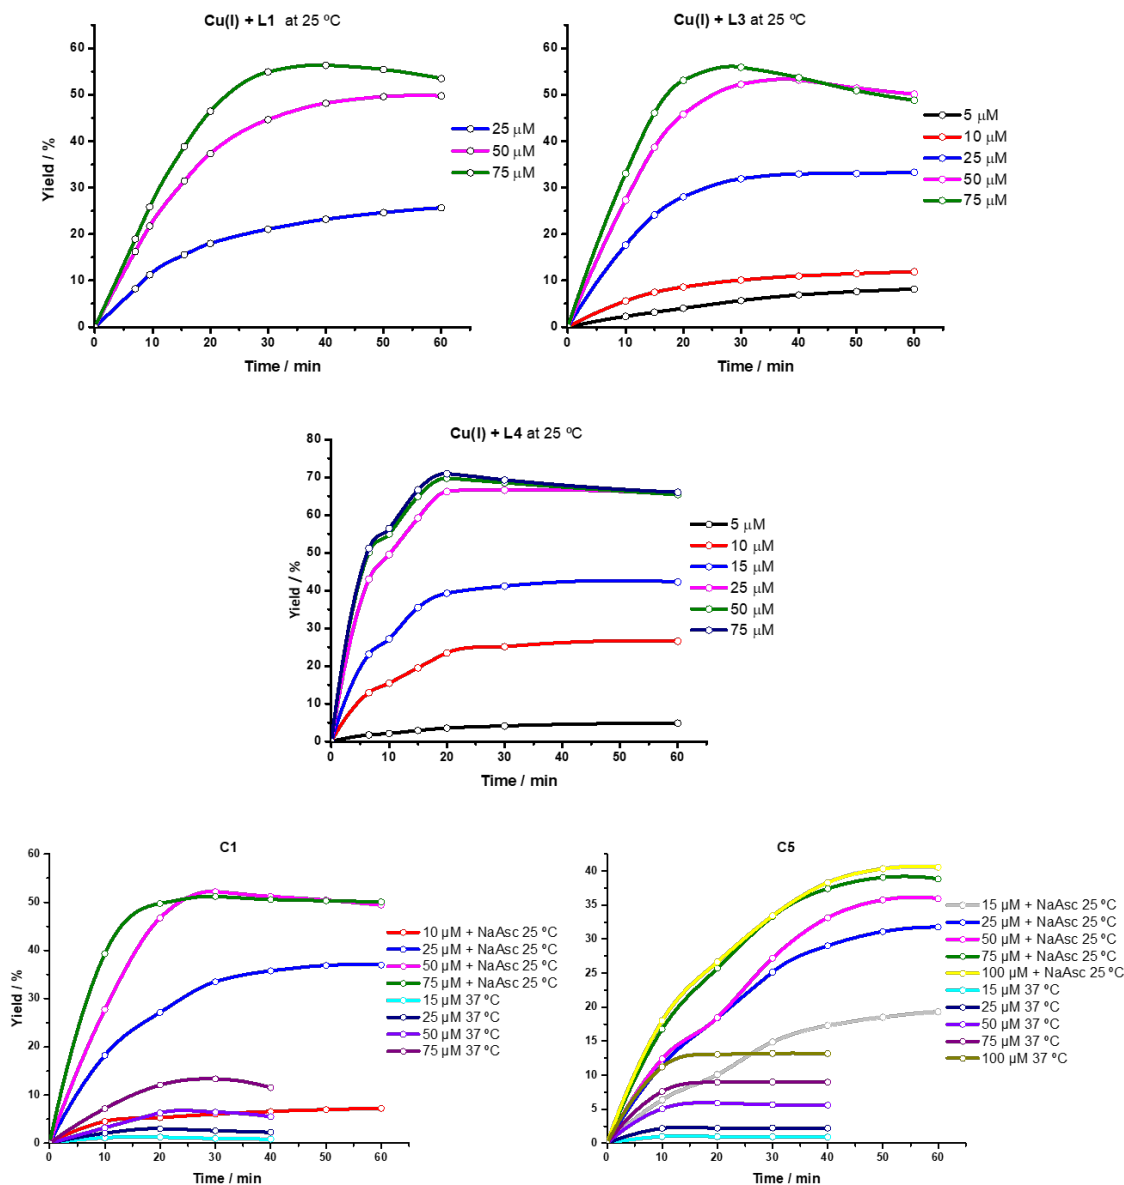

Figure S5. Selected in vitro experiments in water using different concentration of in situ preformed copper complexes with L1, L3 and L4, and defined Cu(I) complexes C1 and C5. The in situ prepared complex with L3 allows comparison with complex C5. Cu(I) + Ln refers to the in situ preformed complex with selected ligand Ln, CuSO<sub>4</sub> and NaAsc.

## S5. Quantification by HPLC-UV

**General Procedure:** The CuAAC reaction of 1 and 2 with the different complexes was also quantified by using analytical HPLC-UV methods.

The Cu(II) mixtures with the corresponding polotriazol ligands were prepared by addition of fresh solutions of CuSO<sub>4</sub> (12.5 μL, 10 mM in H<sub>2</sub>O) to solutions of the ligand (12.5 μL, 20 mM in H<sub>2</sub>O and 5% DMSO) in an eppendorf tube of 500 μL containing 25 μL of milliQ water. The mixture was stirred for 10 min at room temperature under air.

The stock mixture containing the reactants was prepared in an eppendorf tube containing 1688.27 μL of water, by mixing a fresh solution of the azide 1 (3.91 μL, 50 mM, DMSO, 1 equiv) and a fresh solution of alkyne 2 (7.82 μL, 50 mM, H<sub>2</sub>O, 2 equiv). The mixture was stirred for homogenization.

The copper containing mixture (15  $\mu\text{L}$ , 2.5 mM,  $\text{H}_2\text{O}$ ) was added to a eppendorf tube containing the above mixture with both reactants (435  $\mu\text{L}$ ). Finally, sodium ascorbate was added (50  $\mu\text{L}$ , 25 mM,  $\text{H}_2\text{O}$ , 33 equiv), and the reaction carried under air at room temperature.

In case of the predefined Cu(I) complexes, a fresh solution of the complexes C1-C5 (2.5 mM in DMSO) was freshly prepared and immediately added (15  $\mu\text{L}$ , 2.5 mM, DMSO) to an eppendorf tube containing the above prepared solution with both substrates (435  $\mu\text{L}$ ).

Final concentrations: 100  $\mu\text{M}$  azide 1, 200  $\mu\text{M}$  alkyne 2, 75  $\mu\text{M}$  copper complex and 2.5 mM sodium ascorbate (when present). The reaction was carried out under air and without stirring, unless otherwise is mentioned.

The formation of the products was confirmed by analytical HPLC-UV (254 nm), and quantified using a calibration curve with an internal standard. HPLC method:  $\text{H}_2\text{O}/\text{MeCN}$  gradient 95/5  $\rightarrow$  5/95 in 12 min, then 3 min 100% MeCN.

The calibration of azide 1 and triazole 3 was performed in the same HPLC vial, using MeCN as main solvent. The different samples were prepared from a 5 mM fresh stock solution of the analyte in DMSO. Coumarine (870  $\mu\text{M}$  as final concentration) was used as internal standard. The areas obtained from the chromatogram were processed with OriginPro 2016 to obtain the calibration equation and applied to quantify the absorbance of the in vitro experiments.

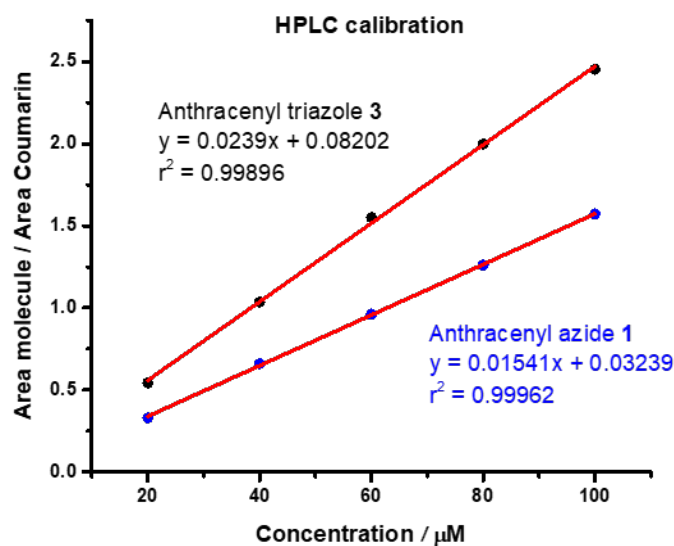

Figure S6. Standard curve of azide 1 and triazole product 3. Linear regression curve for 0-100  $\mu\text{M}$  is shown.

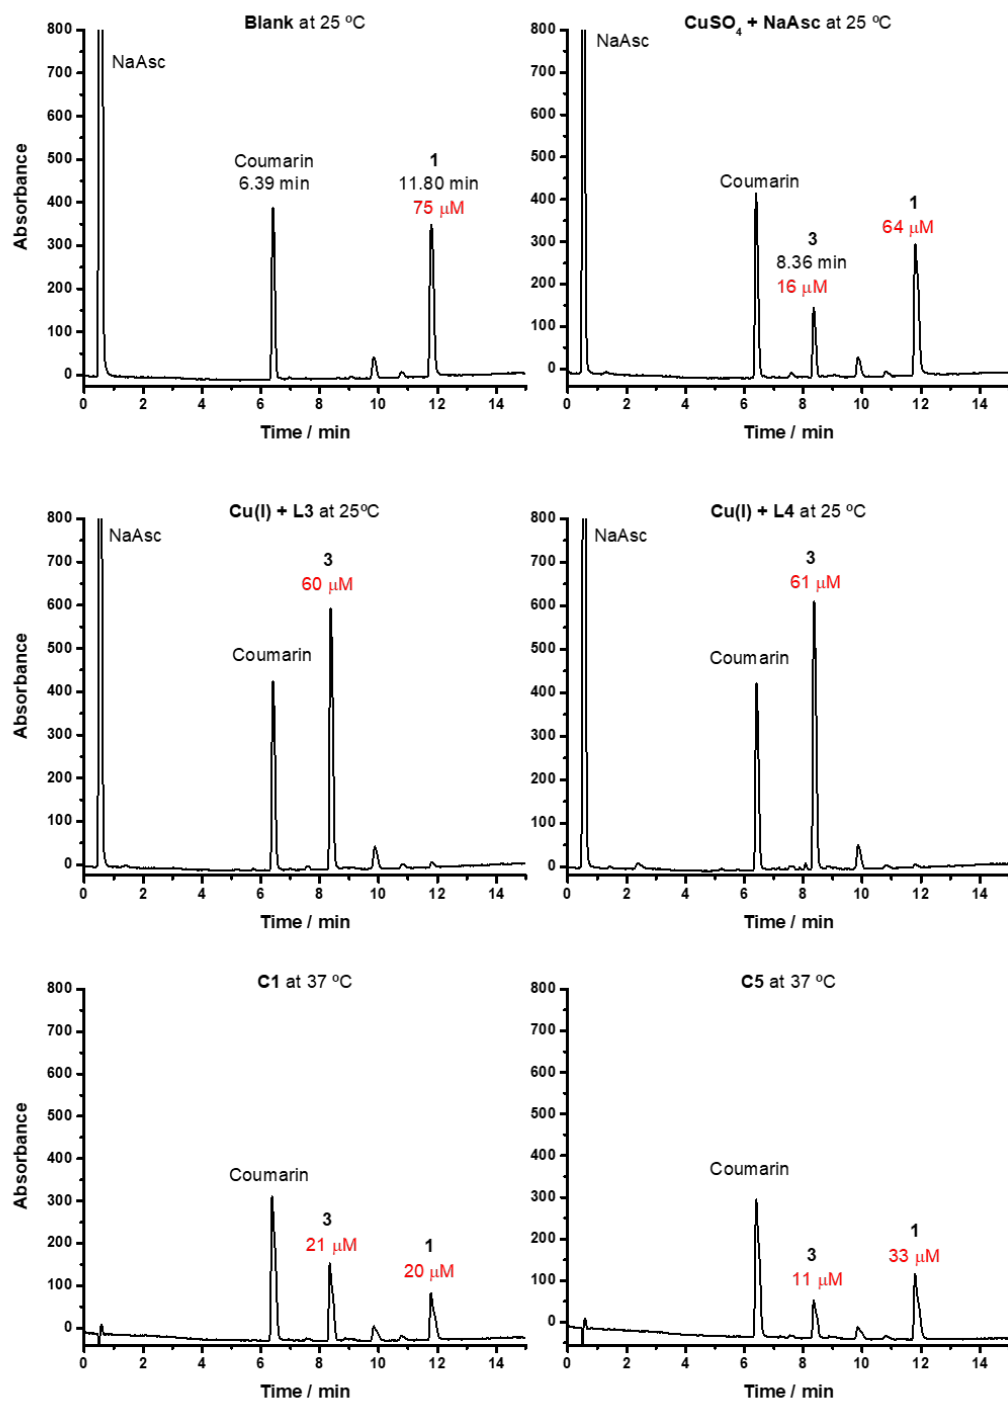

Figure S7. HPLC monitoring of the CuAAC reaction between anthracenyl azide 1 and propargyl alcohol 2 at the indicated temperature

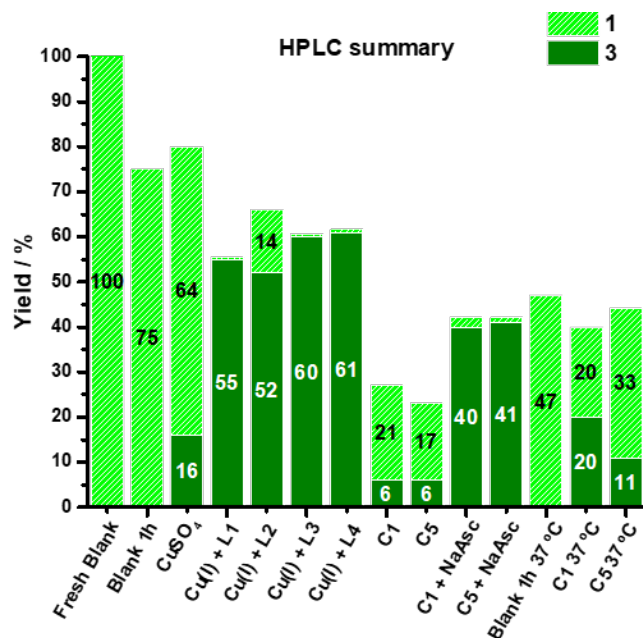

Figure S8. Summary of the CuAAC results obtained using HPLC measurements. Pale green bar corresponds to remaining azide.

## S6. Spectroscopic analysis of the copper complexes

### 6.1 Monitoring the *in situ* formation of Cu(I) complexes with L3

**UV-VIS:** The complexes were prepared *in situ*, under air, by the sequential mixture of a fresh solution of CuSO<sub>4</sub> (0.4 mL, 100 mM in H<sub>2</sub>O), L3 (16.7 mg) and a fresh solution of sodium ascorbate (0.32 mL, 500 mM in H<sub>2</sub>O) in a 2 mL eppendorf tube containing 1.28 mL of H<sub>2</sub>O. The mixture was stirred for 10 min, for a final concentration of 20 mM CuSO<sub>4</sub> (1 equiv), 20 mM L3 (2 equiv) and 80 mM sodium ascorbate (4 equiv).

For the experiments with 2 mM of copper, the mixture was diluted ten times.

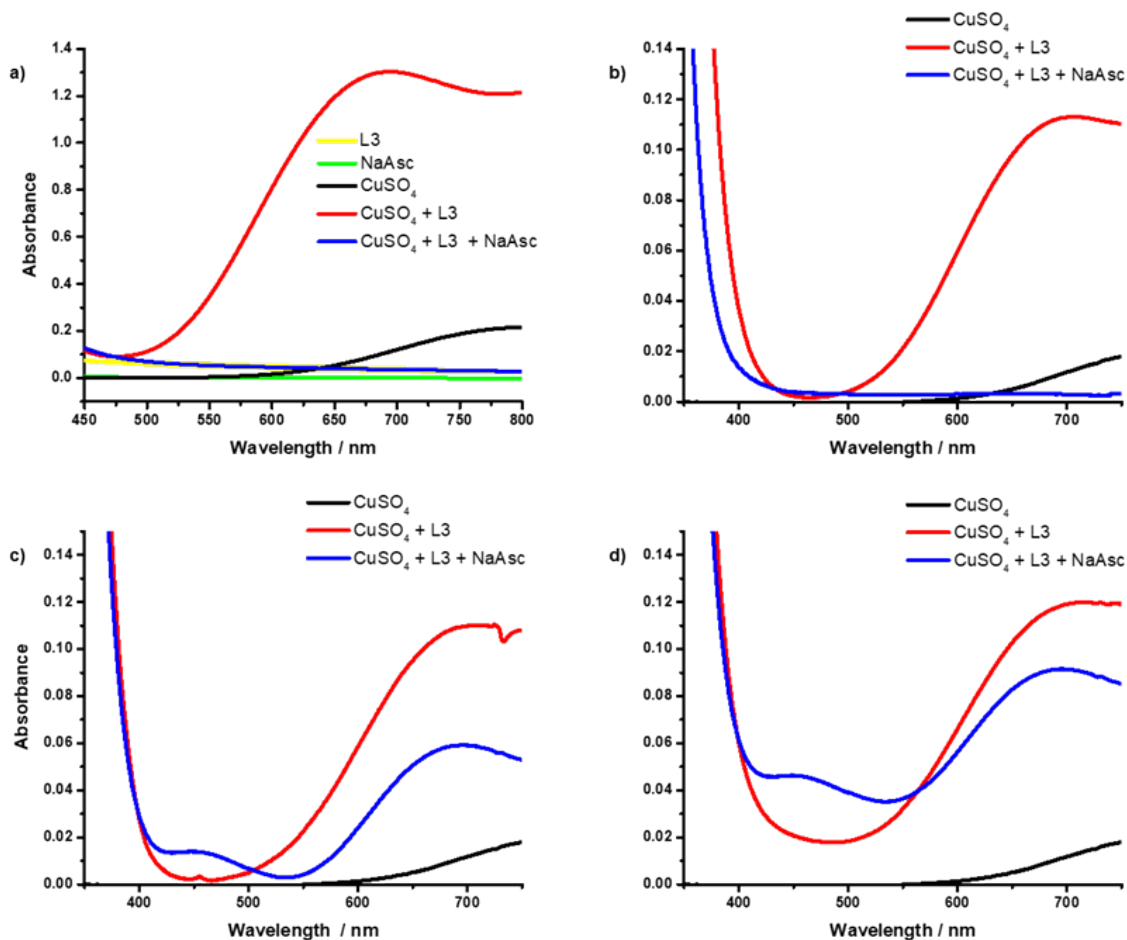

Figure S9. UV spectra at different times. (a) After 10 min of mixing, final concentration of 20 mM of the copper source and L3, and 80 mM of NaAsc; (b) After 10 min of mixing, final concentration of the copper source of 2 mM; (c) The same of (b) after 24 h; (d) The same of (b) after seven days.

**NMR:** The formation of the copper complexes with L3 was also monitored by NMR. The experiment was performed in individual NMR tubes using D<sub>2</sub>O as deuterated solvent at 25 °C:

The complexes were prepared *in situ*, under the air, by the sequential addition in a screw capped vial containing 2 mL of deuterated water, CuSO<sub>4</sub> (3.2 mg), L3 (8.3 mg) and sodium ascorbate (15.8 mg). The final concentration of the mixture is: 10 mM CuSO<sub>4</sub> (1 equiv), 10 mM L3 (1 equiv) and 40 mM sodium ascorbate (4 equiv).

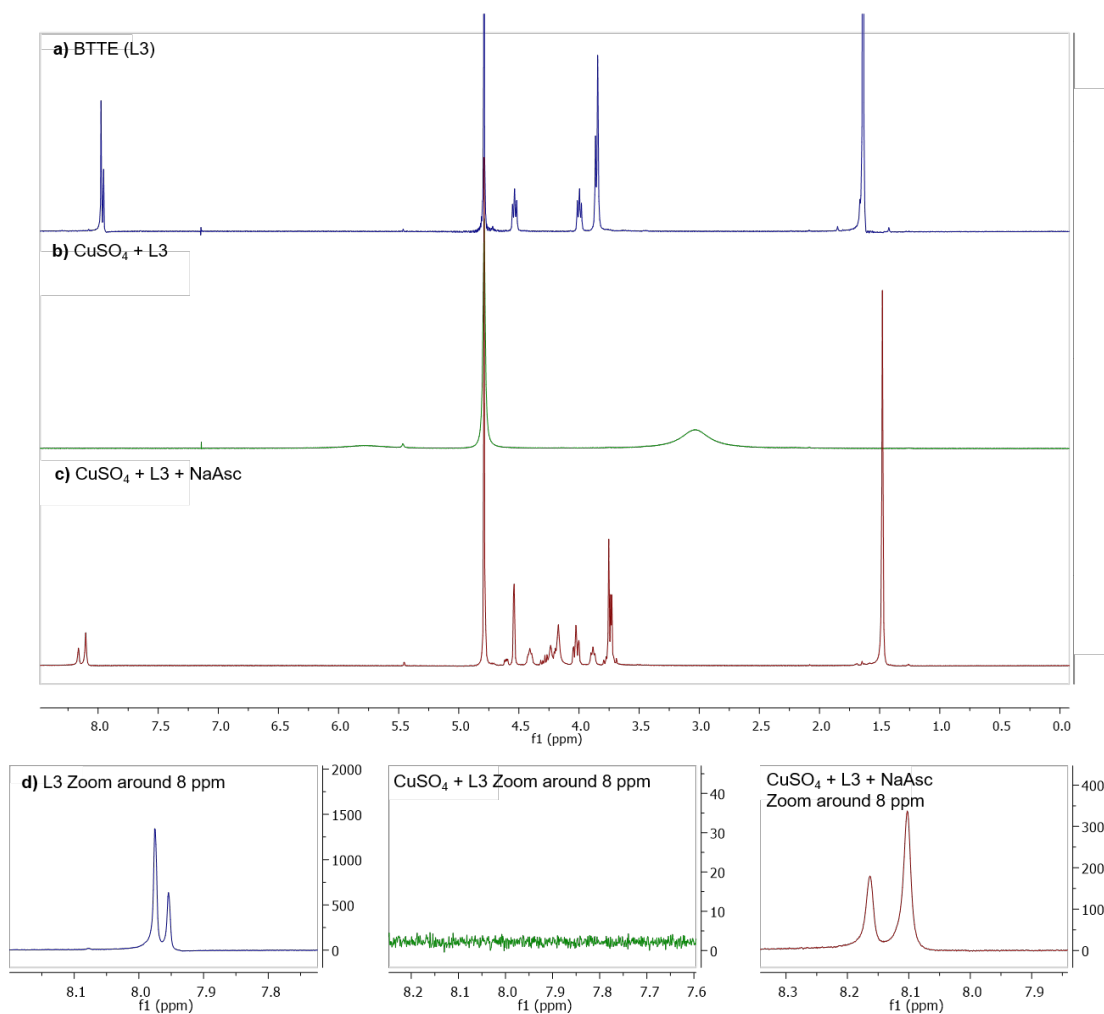

Figure S10.  $^1\text{H}$  NMR spectra (300 MHz) for the in situ made copper complex using L3 as ligand in  $\text{D}_2\text{O}$ . (a) Spectrum of L3 ligand (10 mM, blue line); (b) Spectrum of  $\text{Cu(II)}$  complex with L3 (10 mM L3 and 10 mM of  $\text{CuSO}_4$ , green line); (c) Spectrum of the previous mixture after addition of the reductant (10 mM L3, 10 mM of  $\text{CuSO}_4$  and 40 mM of sodium ascorbate, red line). NaAsc was directly added to the  $\text{D}_2\text{O}$  solution containing the ligand L3 and  $\text{CuSO}_4$ , in the NMR tube under  $\text{N}_2$ ; (d) The triazole proton signal of L3 ligand reappeared at 8.2-8.1 ppm after addition of NaAsc, confirming the presence of diamagnetic  $\text{Cu(I)}$  species.

**EPR:** The studies were performed at 25 °C. For the initial experiment, a solution of  $\text{CuSO}_4$  (10 mM,  $\text{H}_2\text{O}$ , 1 equiv) was mixed with one equivalent of ligand L3 (10 mM,  $\text{H}_2\text{O}$ , 1 equiv) and stirred for 10 min. After the EPR measurement at 120 K, 1.1 equiv of sodium ascorbate (25 mM in  $\text{H}_2\text{O}$ ) was added, and the EPR immediately measured. Another measurement was made after addition of other 0.9 equiv of sodium ascorbate.

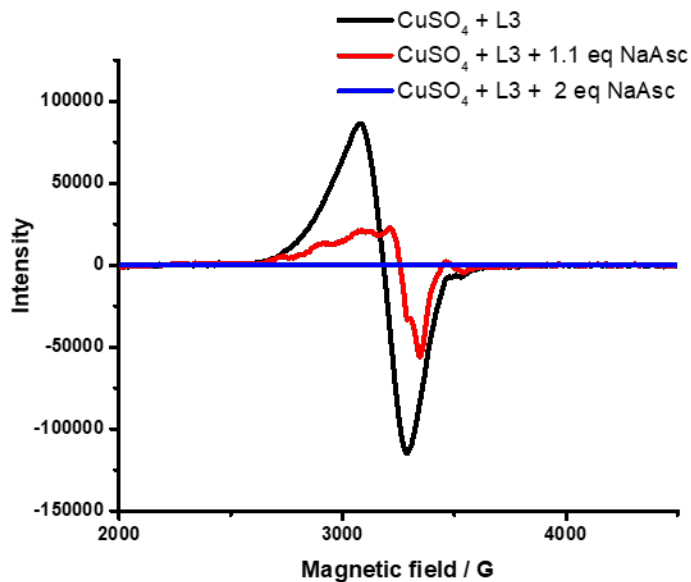

Figure S11. EPR studies of the formation of copper complexes with L3.

### 6.2 Cu(I) complexes C1 and C5. Comparison of their stability by EPR measurements

An initial solution of 10 mM of complexes C1 or C5 complexes in DMSO was used for the measurements, without paying any special effort to prevent the presence of air. Samples were taken from this solution at increasing times and frozen in an EPR capillary with liquid nitrogen.

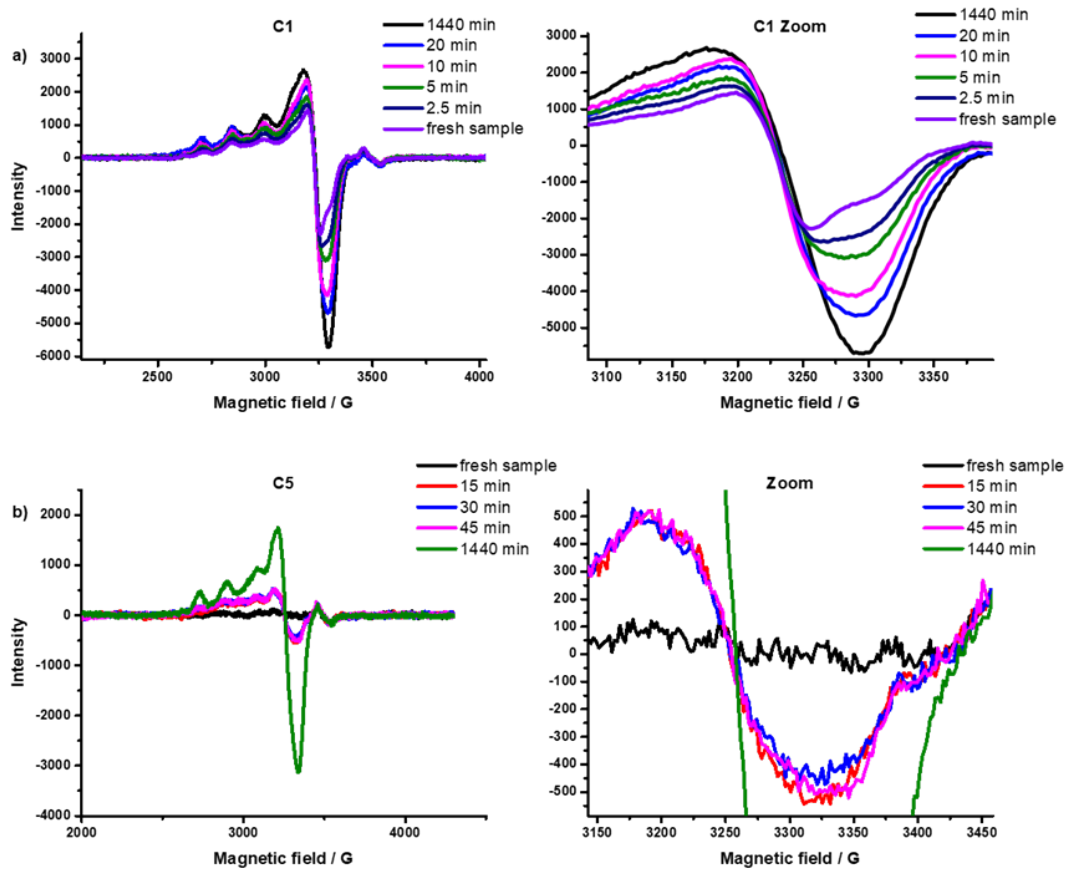

Figure S12. (a) EPR measurements of C1 and enlarged image; (b) EPR measurements of C5 and enlarged image.

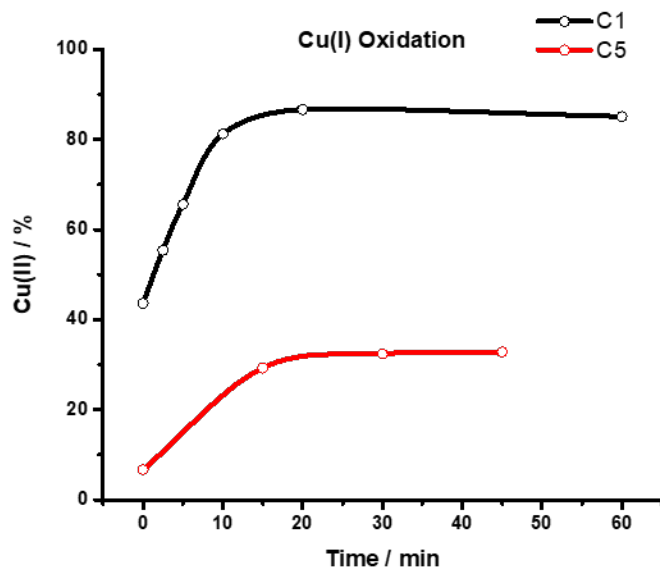

Figure S13. Time dependence of the oxidation of the copper (I) complexes **C1** and **C5**. The sample after 24 h was taken as reference for a complete oxidation of the copper complex (100 % of Cu(II) content), which was further corroborated by NMR.

NMR experiments carried out at time zero, and after 24 h, confirmed the full conversion to the oxidized species after that time, with the disappearance of the signals owing to the paramagnetic behavior of Cu(II). Samples of 24 h were prepared without any taking any special precaution to avoid the oxidation by air.

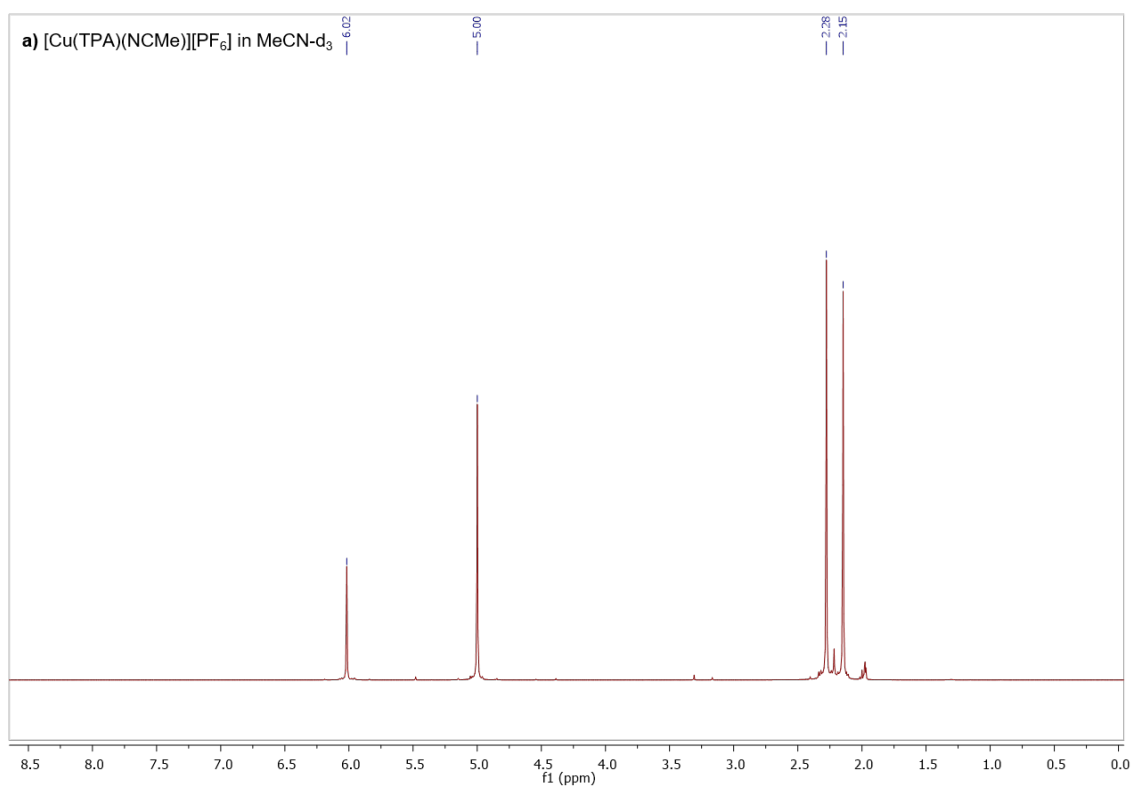



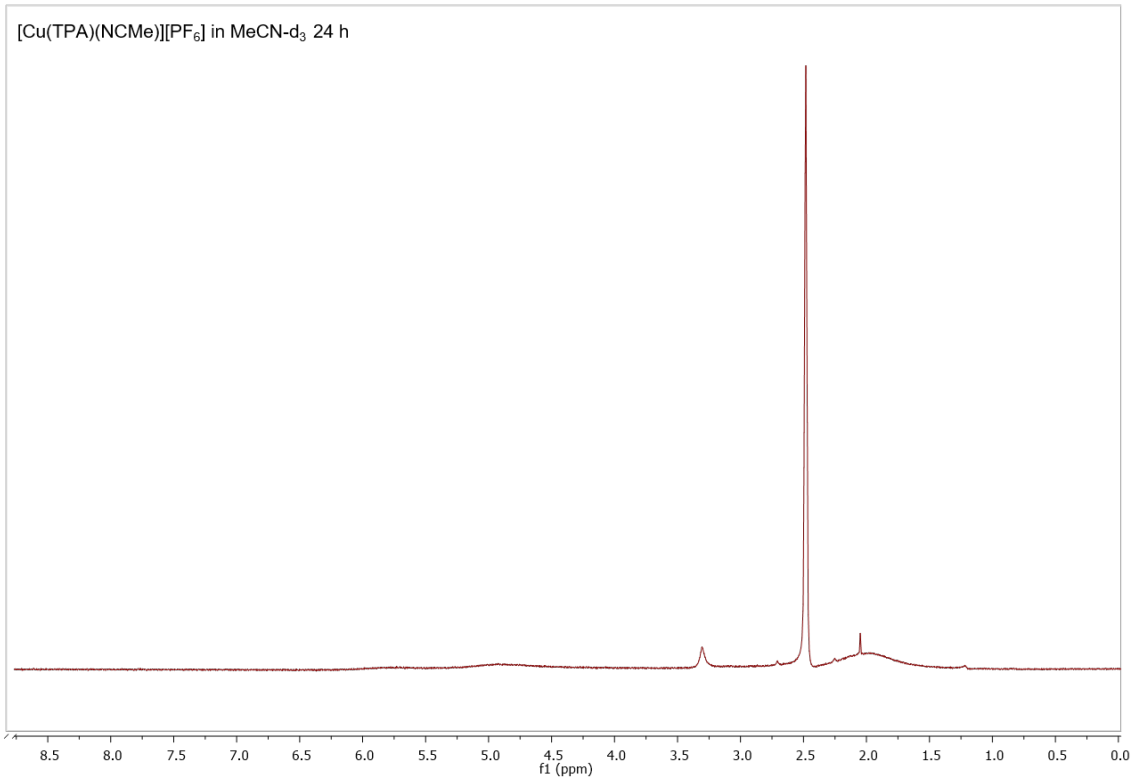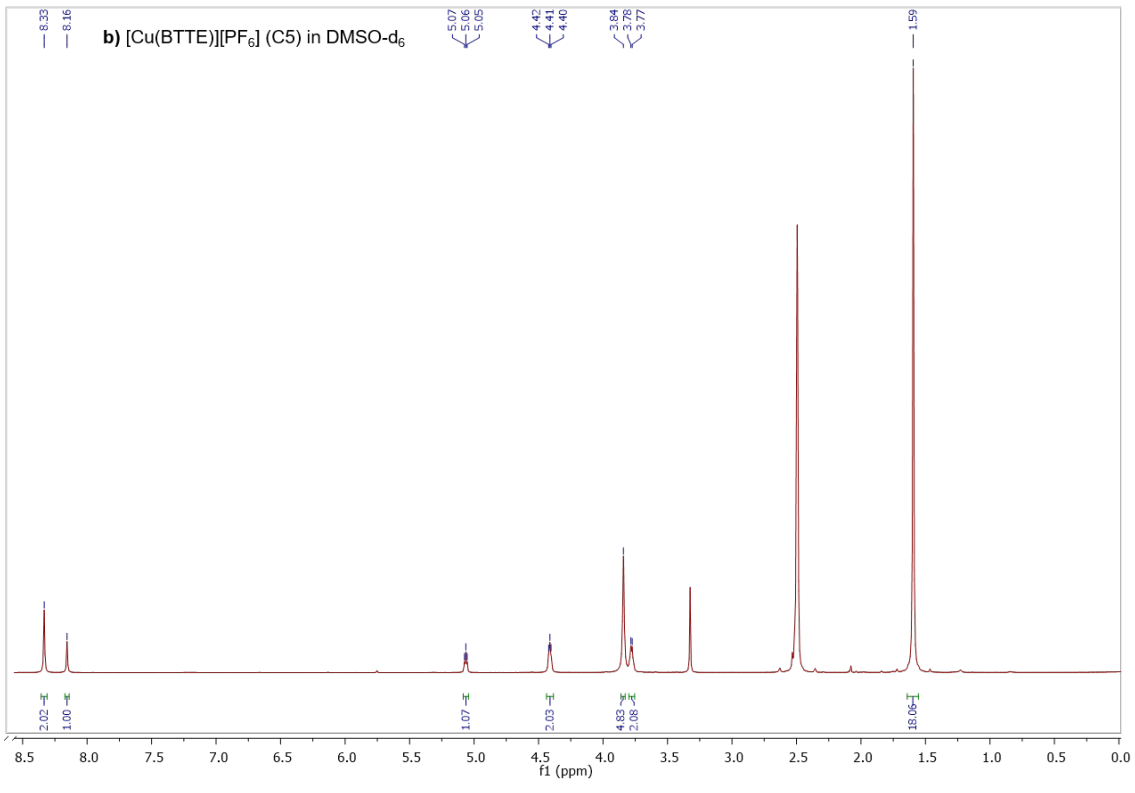

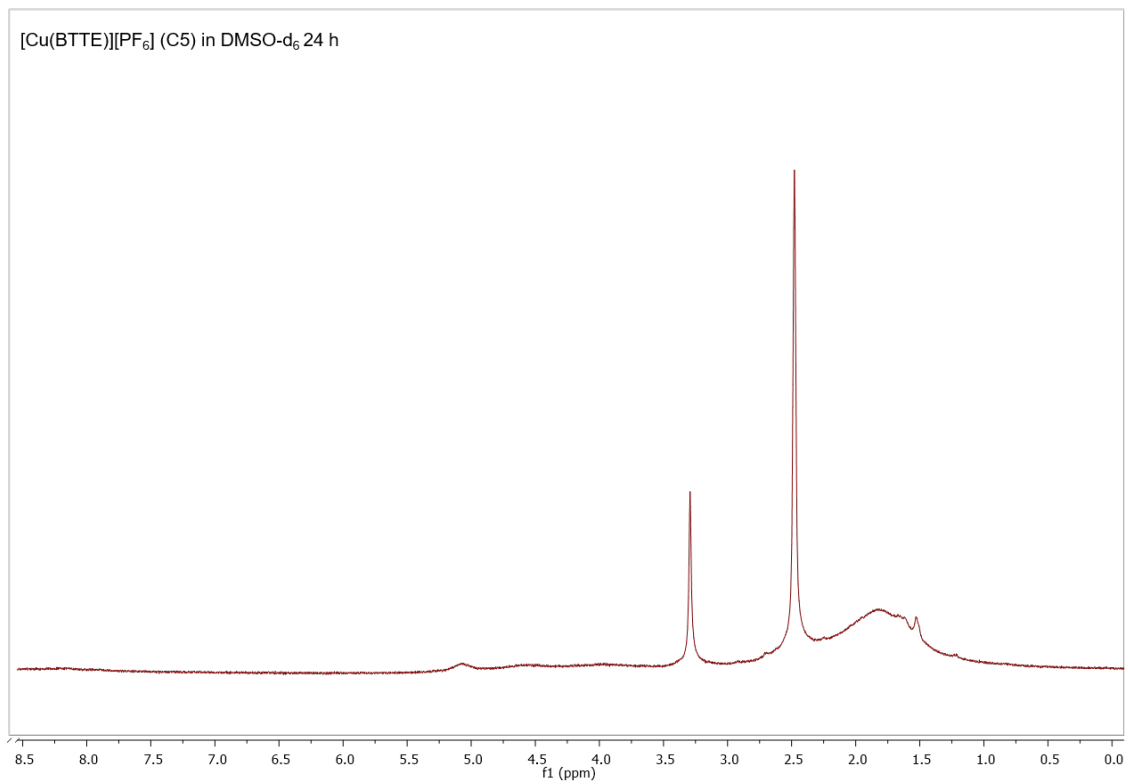

Figure S14. NMR spectra of solutions of complex C1 (a) and complex C5 (b) at the beginning and after 24 h.

## S7. NMR spectra

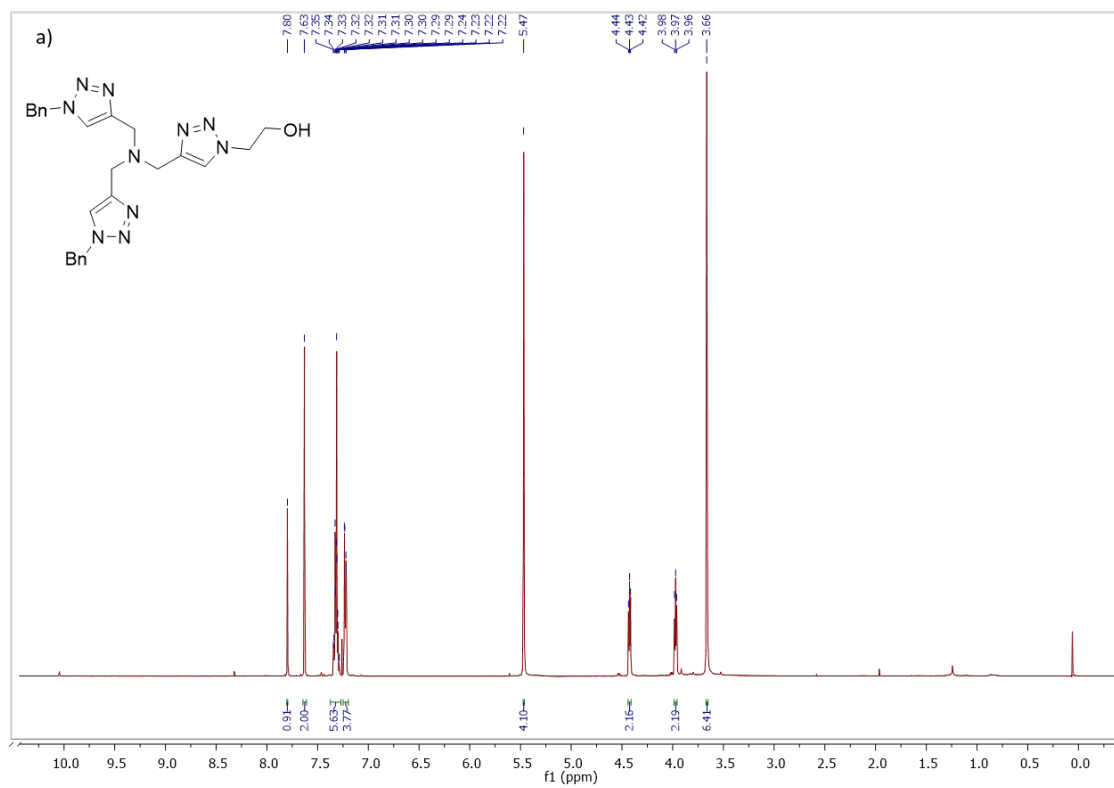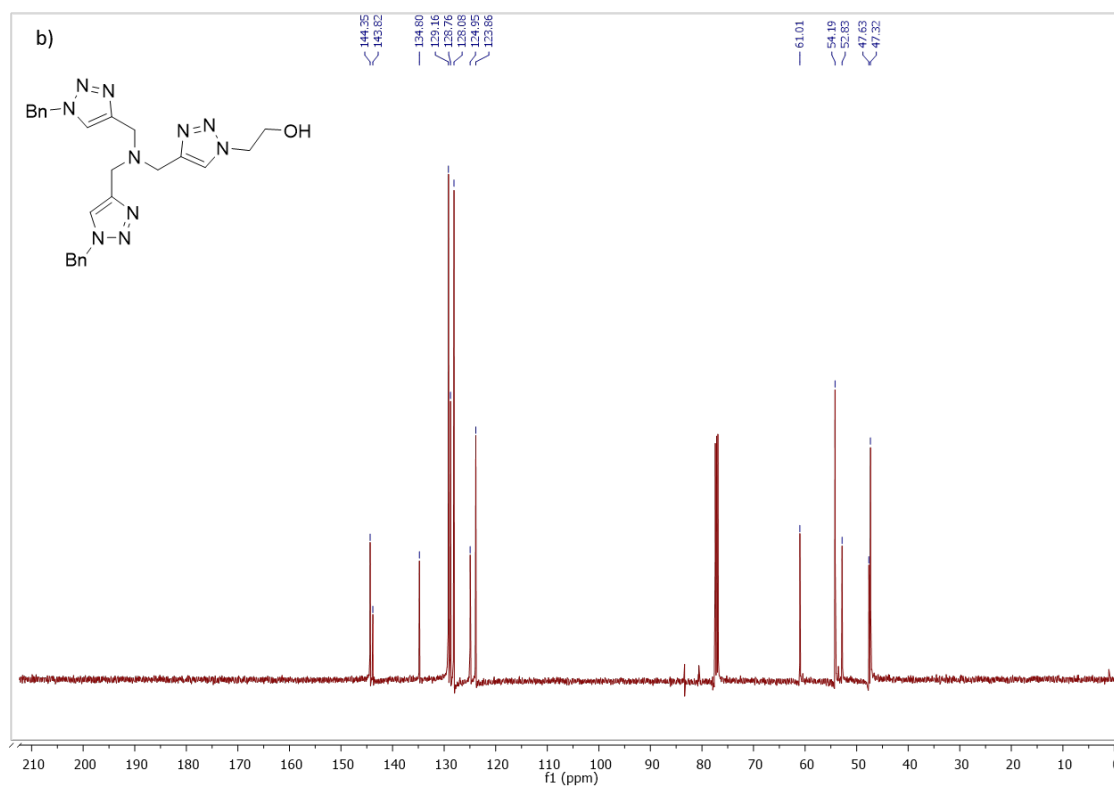

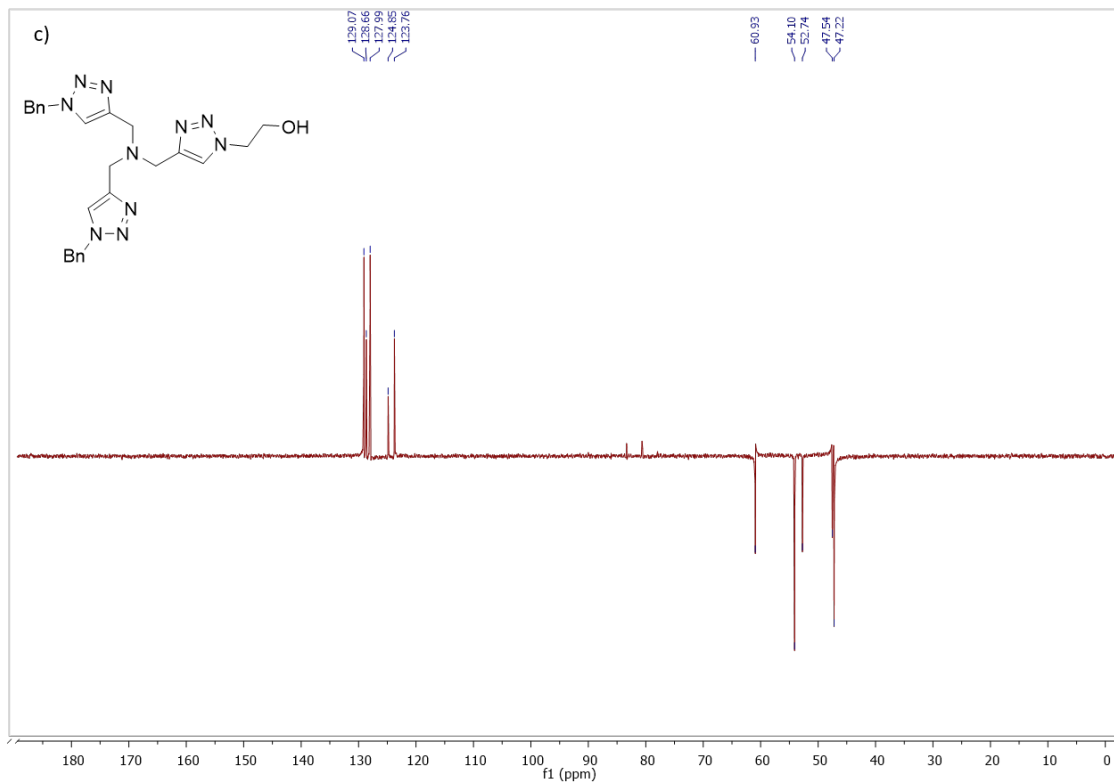

Figure S15. (a)  $^1\text{H}$  NMR; (b)  $^{13}\text{C}$  NMR; (c) DEPT NMR of **L2**.

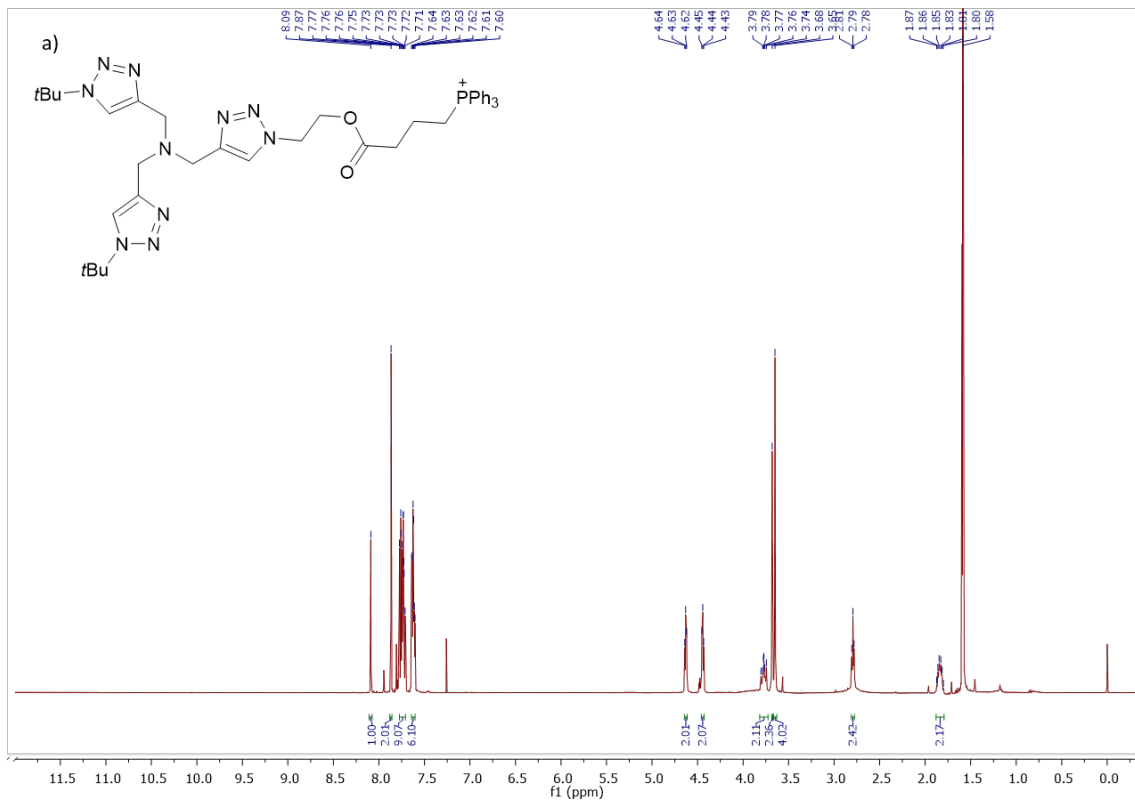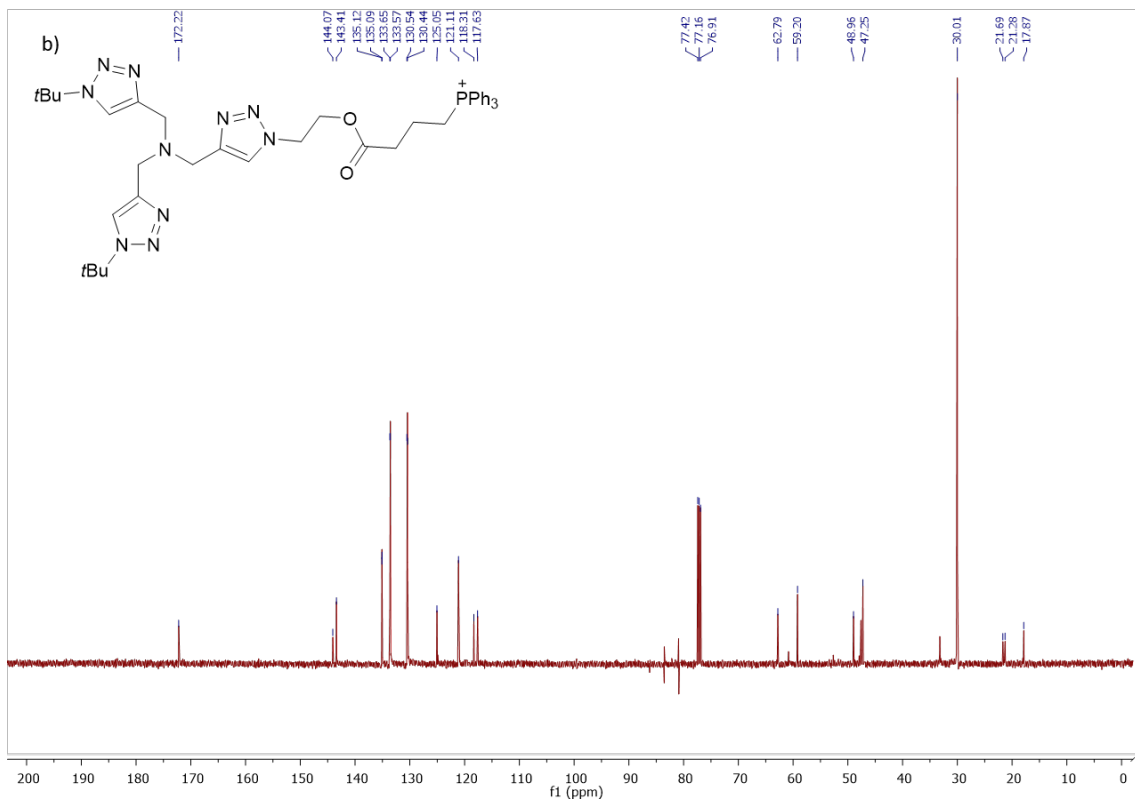

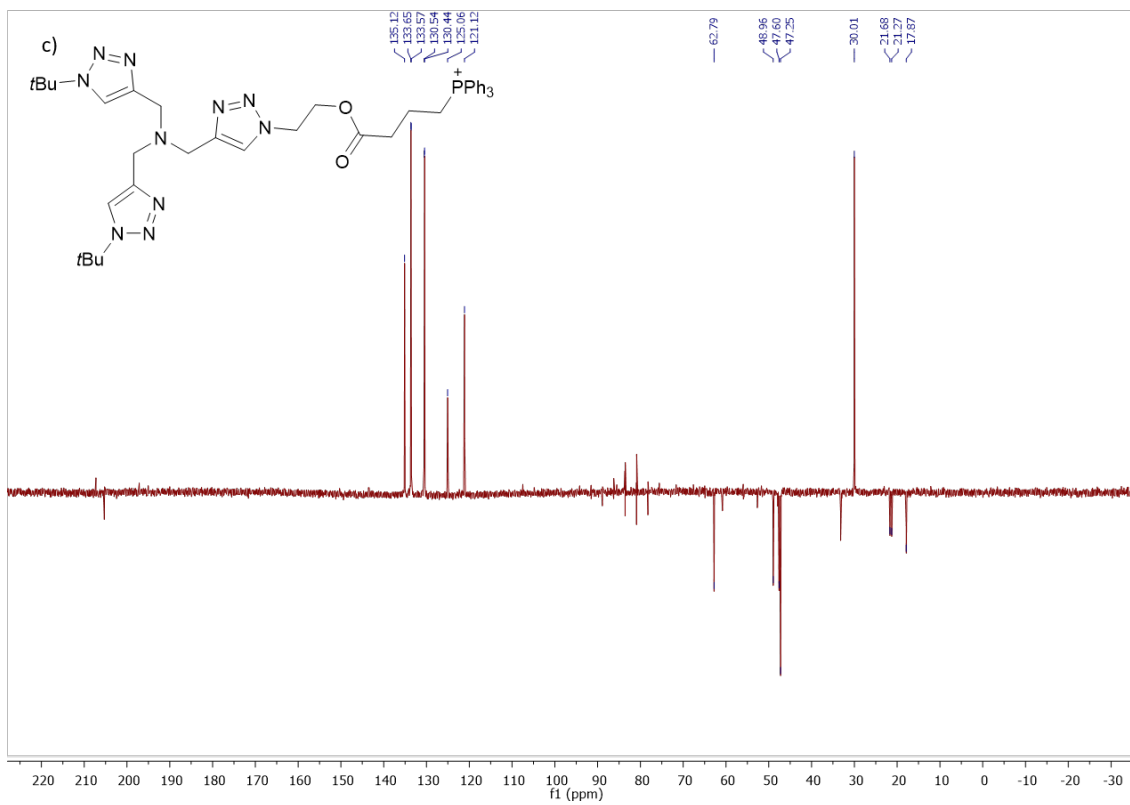

Figure S16. (a)  $^1\text{H}$  NMR; (b)  $^{13}\text{C}$  NMR; (c) DEPT NMR of L4.

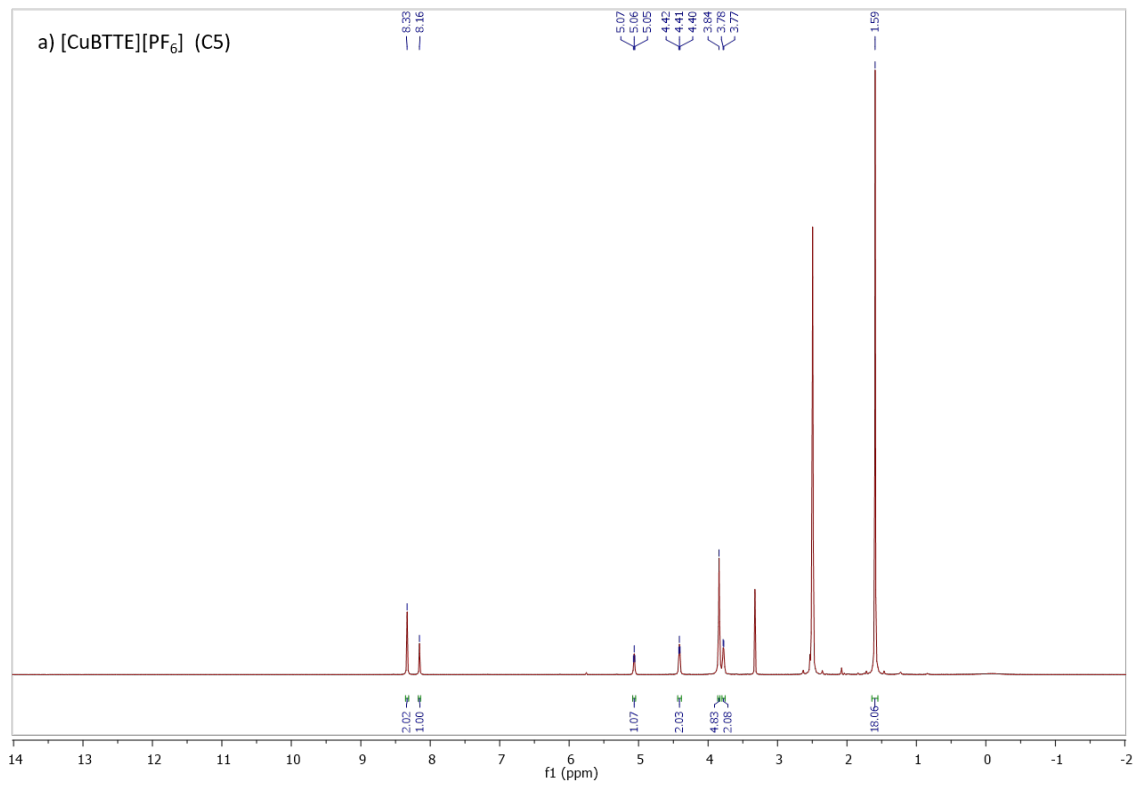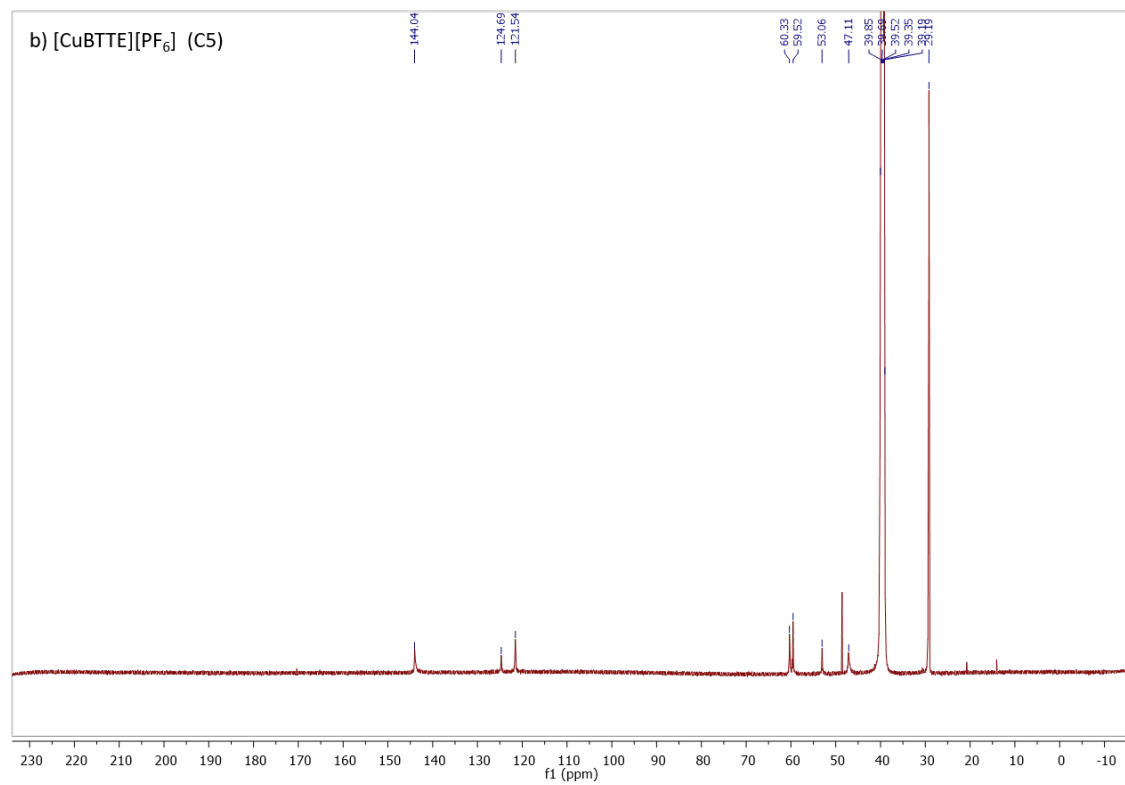

Figure S17. (a) <sup>1</sup>H NMR; (b) <sup>13</sup>C NMR of C5.

## S8. General information for the biological experiments

All steps were performed on a sterile clean bench *Teslta* AV-100 at room temperature. Solutions stored in a fridge were warmed beforehand in a water bath (37 °C). Unless otherwise specified, all incubations were performed in DMEM.

**Cell Culture:** All cell lines were cultured in DMEM (Dulbecco's modified Eagle's medium), 5 mM glutamine, penicillin (100 units mL<sup>-1</sup>) and streptomycin (100 units mL<sup>-1</sup>) (all from Invitrogen). Proliferating cultures were maintained in a 5% CO<sub>2</sub> humidified incubator at 37 °C.

**Fluorescence microscopy:** All images were obtained with an *Andor Zyla* mounted on a *Nikon TiE*. Images were further processed with Image J or NIS software (Nikon).

**Microscopy settings:** The parameters of the fluorescent channels were the following:

For the Nikon (Semrock): filter cube DAPI-1160B-000: BP 387/11 nm, LP 447/60 nm and DM 409 nm; filter cube FITC-3540C-000: BP 482/35 nm, LP 536/40 nm and DM 506 nm; filter cube TRITC-B-000: BP 543/22 nm, LP 593/40 nm and DM 562 nm.

**Cytometry studies:** The studies were performed in a BD Accuri C6 Flow Cytometer. Data were further processed with FlowJo\_V10.

## S9. CuAAC experiments in living cells

### 9.1. Reactions with *in situ* prepared complexes containing ligands L1-L4

The complexes were prepared as follows: in a 500 µL eppendorf tube were successively added 52 µL of MilliQ-H<sub>2</sub>O, 1.875 µL of CuSO<sub>4</sub> (100 mM in H<sub>2</sub>O) and 18.75 µL of the corresponding ligand (20 mM in H<sub>2</sub>O). The solution was kept 1 h at room temperature. Then, 2.34 µL of sodium ascorbate (500 mM in H<sub>2</sub>O) were added to the solution, and the mixture incubated for 30 min at room temperature. The final concentration of copper was 2.5 mM.

Cells growing on glass coverslips were incubated with the *in situ* made copper complex with ligands L1-L4 (12 µL of the above solution) in 388 µL of DMEM for 30 minutes, for a final copper concentration of 75 µM. Cells were then washed twice with 400 µL of DMEM and incubated with a solution of propargyl alcohol (**2**) (200 µM) and anthracenyl azide (**1**) (100 µM) in 400 µL of DMEM for 1 hour. Prior to observation by fluorescence microscopy, the samples were washed twice with 400 µL of DMEM. The coverslips were observed "in vivo" in a fluorescence microscope equipped with adequate filters. Digital pictures of the different samples were taken under identical conditions of gain and exposure. The micrographies displayed in Figure S19 corroborate the results reported in the main text.



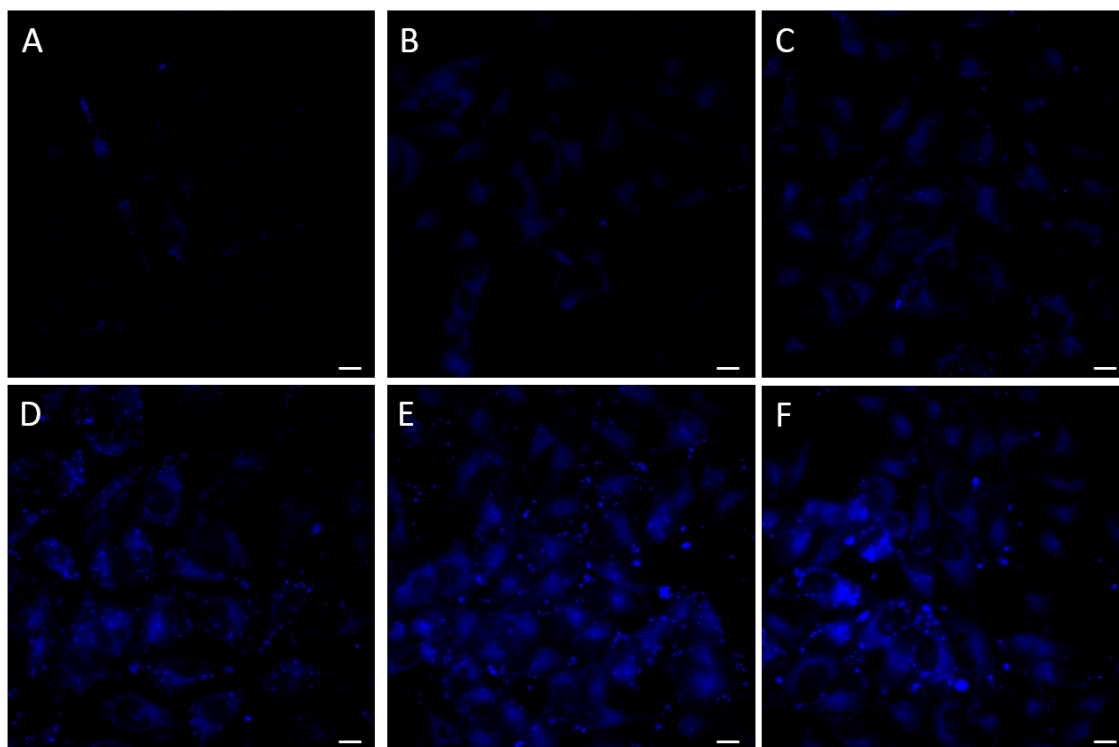

Figure S18. Fluorescence micrographies in experiments carried out using *in situ* preformed Cu(I)/Ln species and HeLa cells. The *in situ* made copper(I) complexes were made by mixing 75  $\mu\text{M}$   $\text{CuSO}_4$ , 2 equiv Ln, and 6 equiv NaAsc for 10 min. Reaction conditions: Cells were incubated with the copper containing mixture (75  $\mu\text{M}$ ) for 30 minutes, followed by two washings with DMEM (2  $\times$  5 min) and treatment with substrates **1** (100  $\mu\text{M}$ ) and **2** (200  $\mu\text{M}$ ) for 1 h, followed by double washing with DMEM (2  $\times$  5 min). A: Control experiment with cells incubated with azide **1** (100  $\mu\text{M}$ ) and alkyne **2** (200  $\mu\text{M}$ ) for 1 h, followed by double washing with DMEM (2  $\times$  5 min), without the copper (I) mixture. B-F: Cells after incubation with the copper containing mixtures (30 min), DMEM washings (2  $\times$  5 min), and treatment with **1** (100  $\mu\text{M}$ ) and **2** (200  $\mu\text{M}$ ) for 1 h, followed by double washing with DMEM (2  $\times$  5 min). B: without ligands. C: with **L2**. D: with **L3**. E: with **L1**. F: with **L4**. Basal levels of fluorescence were normalized by LUT equalization. Scale bar, 12.5  $\mu\text{m}$ .

## 9.2. Reactions with the defined complexes C1-C5

A fresh solution of each catalyst (10 mM in DMSO) in a 2 mL eppendorf tube was prepared before the experiment.

Cells growing on glass coverslips were incubated with either catalyst **C1-C5** (50  $\mu\text{M}$ , 2  $\mu\text{L}$  of the fresh solution) in 398  $\mu\text{L}$  of DMEM for 30 minutes. Cells were then washed twice with 400  $\mu\text{L}$  of DMEM and incubated with the mixture of propargyl alcohol (**2**) (200  $\mu\text{M}$ ) and anthracenyl azide (**1**) (100  $\mu\text{M}$ ) in 400  $\mu\text{L}$  of DMEM for 1 hour. Prior to observation by fluorescence microscopy, the samples were washed twice with 400  $\mu\text{L}$  of DMEM. The coverslips were observed in a fluorescence microscope equipped with adequate filters. Digital pictures of the different samples were taken under identical conditions of gain and exposure. The micrographies displayed in Figure S20 corroborate the results reported in the main text.

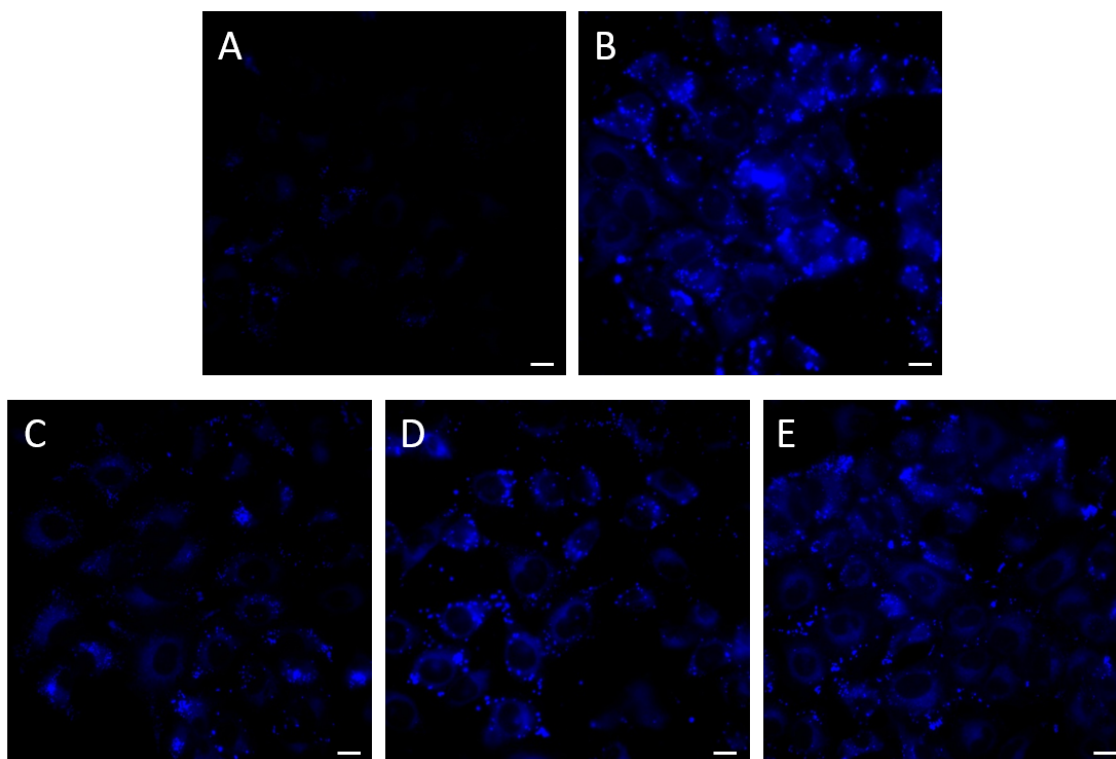

Figure S19. Fluorescence micrographies in experiments carried out using preformed Cu(I) complexes **C1**, **C2**, **C4** and **C5** in A549 cells. A: Control experiment without copper complex; cells incubated with azide **1** (100  $\mu$ M) and alkyne **2** (200  $\mu$ M) for 1 h, followed by double washing with DMEM (2  $\times$  5 min). B-E: Cells after incubation with the preformed Cu(I) complex (50  $\mu$ M) for 30 min, DMEM washings (2  $\times$  5 min), and treatment with **1** (100  $\mu$ M) and **2** (200  $\mu$ M) for 1 h, followed by double washing with DMEM (2  $\times$  5 min) (B: **C5**. C: **C1**. D: **C2**. E: **C4**). A 10 mM solution of the Cu(I) complexes in DMSO was freshly prepared and used immediately to avoid oxidation of the complex. Basal levels of fluorescence were normalized by LUT equalization. Scale bar, 12.5  $\mu$ m.

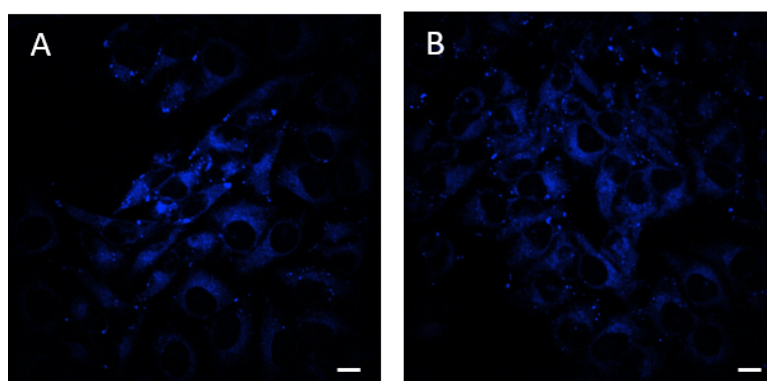

Figure S20. Fluorescence micrographies in experiments carried out using in situ preformed Cu(I)/L3 and HeLa cells, and the same experiment in presence of EDTA. A: Cells after incubation with the copper containing mixtures (75  $\mu$ M, 30 min), DMEM washings (2  $\times$  5 min), and treatment with **1** (100  $\mu$ M) and **2** (200  $\mu$ M) for 1 h, followed by double washing with DMEM (2  $\times$  5 min). B: Cells after incubation with the copper containing mixtures (75  $\mu$ M, 30 min), DMEM washings (2  $\times$  5 min), EDTA washing (150  $\mu$ M, 10 min) and treatment with **1** (100  $\mu$ M) and **2** (200  $\mu$ M) for 1 h, followed by double washing with DMEM (2  $\times$  5 min). Basal levels of fluorescence were normalized by LUT equalization. Scale bar, 12.5  $\mu$ m.

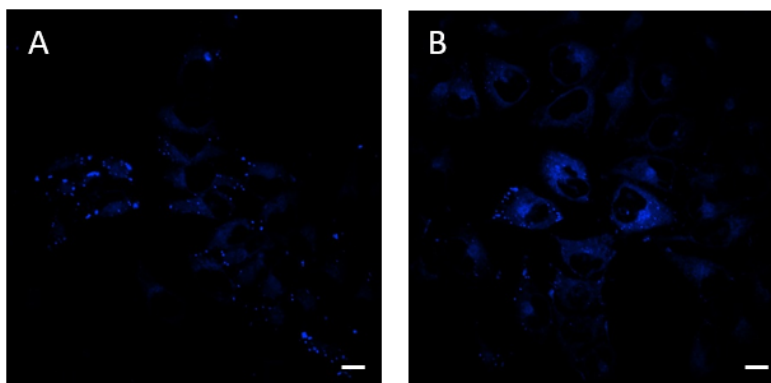

Figure S21. Fluorescence micrographies in experiments carried out using Cu(II)/L3 species and HeLa cells, without or with a reductant. A: Cells after incubation with a premade mixture of CuSO<sub>4</sub> and 2 equiv of L3, (75  $\mu$ M in copper, 30 min), DMEM washings (2 x 5 min), and treatment with 1 (100  $\mu$ M) and 2 (200  $\mu$ M) for 1 h, followed by double washing with DMEM (2 x 5 min). B: Cells after incubation with the same copper(II) containing mixture (75  $\mu$ M, 30 min), DMEM washings (2 x 5 min), and addition of NaAsc (450  $\mu$ M, 20 min), DMEM washings (2 x 5 min) and treatment with 1 (100  $\mu$ M) and 2 (200  $\mu$ M) for 1 h, followed by double washing with DMEM (2 x 5 min). Basal levels of fluorescence were normalized by LUT equalization. Scale bar, 12.5  $\mu$ m.

### S10. Viability Assays

The toxicity of the *in situ* made copper complexes with ligands L1-L4, as well as of the defined complexes C1-C5 was tested by MTT assays in HeLa cell line as follows: 150000 cells per well were seeded in 96 well plates one day before treatment with different concentrations of the catalysts in 100  $\mu$ L of DMEM. After the adequate time of incubation (2 h or 12 h), Thiazolyl Blue Tetrazolium Bromide (*Sigma*) was added to the cell culture medium to a final concentration of 0.5 mg mL<sup>-1</sup>. Cells were then incubated for 4 h to allow the formation of formazan precipitates by metabolically active cells. A detergent solution of 10% SDS (sodium dodecyl sulfate) and 0.01 M HCl was then added and the plate was incubated overnight at room temperature to allow the solubilization of the precipitates. The quantity of formazan in each well (directly proportional to the number of viable cells) was measured by recording changes in absorbance at 570 nm in a microtiter plate reading spectrophotometer (*Tecan Infinite 200 PRO*).

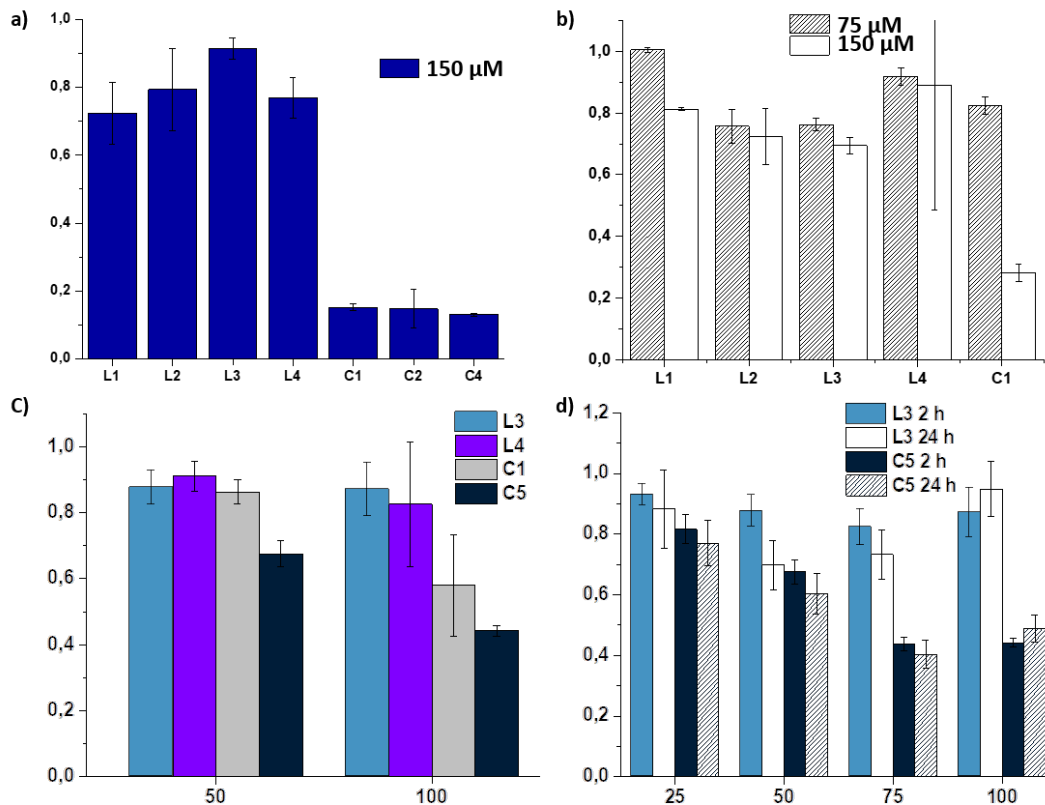

Figure S22. Viability Assays (MTT). HeLa cells were incubated in cell culture medium containing the indicated amounts of the copper complexes: (a) In situ made Cu(I) complexes with L1-L4 and preformed complexes C1, C2 and C4 for 12 h; (b) In situ made Cu(I) complexes with L1-L4 for 2 h; (c) in situ made Cu(I) complexes with L3 and L4 and defined complexes C1 and C5, after 2 h; (d) in situ made Cu(I) complex with L3 and defined complex C5 after 2 h and 24 h. The viability is expressed as the fold change of the absorbance value with respect to untreated cells (value 1.0).

**In assessing these results, it must be taken into account that the amount of copper internalized depends on the complexes, and the toxicity can be in great part associated to such cell entrance.**

### S11. ICP analysis

For the ICP measurements, a total of  $3 \times 10^6$  HeLa cells growing in 6 well plates were treated with each copper complex. Each well was incubated with the different *in situ* made copper complexes with L1-L4 (75  $\mu\text{M}$ , 22.5  $\mu\text{L}$  of the fresh solution) in 728  $\mu\text{L}$  of DMEM, or the different defined Cu(I) complexes C1-C5 (50  $\mu\text{M}$ , 3.75  $\mu\text{L}$  of the fresh solution) in 747  $\mu\text{L}$  of DMEM for 1 h. Prior to digestion, the samples were washed with 750  $\mu\text{L}$  of DMEM and then twice with 750  $\mu\text{L}$  of PBS. The obtained fractions were digested in duplicate in 500  $\mu\text{L}$  of  $\text{HNO}_3$  (70%) by microwave heating and analyzed.

For the membrane protein extraction, after incubation with the copper complexes for 1 h, the samples were washed with 750  $\mu\text{L}$  of DMEM and then twice with 750  $\mu\text{L}$  of PBS. Then a commercial kit (Mem-PER Plus Membrane Protein Extraction Kit -Thermo-Fisher Scientific-) was used to isolate membrane and cytosolic cellular fractions.

#### Procedure for Membrane Protein Extraction from HeLa cells with Mem-PER Plus Membrane Protein Extraction Kit

$3 \times 10^6$  cells were resuspended in 500  $\mu\text{L}$  of DMEM by scraping the cells off the surface of the plate with a cell scraper. Then, the harvested cell suspension was centrifuged at  $300 \times g$  for 5 minutes. The cell pellet was washed with 300  $\mu\text{L}$  of Cell Wash Solution and centrifuged at  $300 \times g$  for 5 minutes.

Carefully the supernatant was removed and discarded. The cells were resuspended in 500  $\mu\text{L}$  of Cell Wash Solution, transferred to a 0.5 mL Eppendorf and centrifuged at  $300 \times g$  for 5 minutes. The supernatant was discarded. After addition of 150  $\mu\text{L}$  of Permeabilization Buffer to the cell pellet, the eppendorf was vortexed briefly to obtain a homogeneous cell suspension and then incubated 10 minutes at  $4^\circ\text{C}$  with constant mixing. The permeabilized cells were centrifuged for 15 minutes at  $16,000 \times g$ . The supernatant containing cytosolic proteins was carefully removed and transferred to a new eppendorf. Then, 200  $\mu\text{L}$  of Solubilization Buffer were added to the pellet and resuspended by pipetting up and down. The eppendorfs were incubated at  $4^\circ\text{C}$  for 30 minutes with constant mixing. Finally, the eppendorfs were centrifuged at  $16,000 \times g$  for 15 minutes at  $4^\circ\text{C}$  and the supernatant containing solubilized membrane and membrane-associated proteins was transferred to a new eppendorf. The obtained fractions were digested in duplicate in  $\text{HNO}_3/\text{H}_2\text{O}_2$  by microwave heating and analyzed.

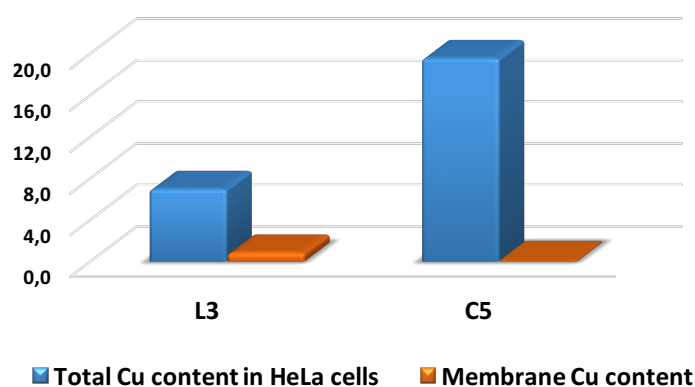

Figure S23. ICP-MS results of the copper accumulated in the membrane of HeLa cells.

### S12. Flow cytometry studies of the reactivity

Cytometry studies were performed in HeLa cells: 200000 cells per well were seeded in 96 well plates one day before treatment. Then, it was followed the same protocol described for the experiments in living cells, scaling the experiment to a final volume of 100  $\mu\text{L}$  of DMEM. After the incubation time, cells were washed twice with 100  $\mu\text{L}$  of PBS, harvested with 100  $\mu\text{L}$  of trypsin/EDTA for 15 min and resuspended in 2% FBS in 100  $\mu\text{L}$  of PBS buffer with 5 mM EDTA. The fluorescence was analyzed by flow cytometry. As observed in Figure 5 of the main text, quantification by flow cytometry showed clear presence of the product using the violet laser and the emission filter (450/50).

### S13. Quantification of the reaction inside living cells

**General Procedure:** The CuAAC reaction of **1** and **2** with different copper complexes in living cells was quantified by fluorescence measurements using a microplate reader.

The experiments were performed in plates of 12 wells as follows:

100000 cells per well were seeded in 12 well plated two days before treatment with the copper complex and the substrates. For each complex the experiment was done by triplicate.

To normalize the results, number of cells was measured after the experiments were performed. For this, after the incubation time with each complex, cells were washed twice with 400  $\mu\text{L}$  of PBS, harvested with 100  $\mu\text{L}$  of trypsin/EDTA for 5 min at  $37^\circ\text{C}$  and resuspended in 300  $\mu\text{L}$  of DMEM buffer. An aliquot of 50  $\mu\text{L}$  was transferred to an 0.500 mL Eppendorf and diluted with 450  $\mu\text{L}$  of PBS. Then cells were measured with *Scepter™ 2.0 Handheld Automated Cell Counter*.

### 1. Reactions with *in situ* prepared complexes containing ligand L3

The complexes were prepared as follows: in a 500  $\mu\text{L}$  eppendorf tube were successively added 52  $\mu\text{L}$  of MilliQ- $\text{H}_2\text{O}$ , 1.875  $\mu\text{L}$  of  $\text{CuSO}_4$  (100 mM in  $\text{H}_2\text{O}$ ) and 18.75  $\mu\text{L}$  of L3 (20 mM in  $\text{H}_2\text{O}$ ). The solution was kept 1 h at room temperature. Then, 2.34  $\mu\text{L}$  of sodium ascorbate (500 mM in  $\text{H}_2\text{O}$ ) were added to the solution, and the mixture incubated for 30 min at room temperature. The final concentration of copper was 2.5 mM.

Cells growing on plates of 12 wells were incubated with the *in situ* made copper complex with ligand L3 (8  $\mu\text{L}$  of the above solution) in 392  $\mu\text{L}$  of DMEM for 30 minutes, for a final copper concentration of 75  $\mu\text{M}$ . Cells were then washed twice with 400  $\mu\text{L}$  of DMEM and incubated with a solution of propargyl alcohol (**2**) (200  $\mu\text{M}$ ) and anthracenyl azide (**1**) (100  $\mu\text{M}$ ) in 400  $\mu\text{L}$  of DMEM for 1 hour. Prior to lisation, the samples were washed with 400  $\mu\text{L}$  of DMEM followed by two washes with PBS (400  $\mu\text{L}$ ). Then 100  $\mu\text{L}$  of a solution of 80% of MeOH in water were added to each well. After 5 min and pipetting up they were transferred to a microplate of 96 well.

Cells were also incubated only with substrates **1** and **2** for 1 h. These cells were treated in the same way and the lysates were used as negative control, to eliminate the fluorescent background signal.

The results were analyzed by fluorescence measurements in a microplate reader (*Tecan infinite F200Pro*). Fluorescence data were obtained by using an excitation wavelength of 360 nm and recorded at 465 nm. Every measured value is the mean value of three aliquots.

### 2. Reactions with the defined complex C5

A fresh solution of each catalyst (10 mM in DMSO) in a 2 mL eppendorf tube was prepared before the experiment.

Cells growing on plate of 12 wells were incubated with catalyst C5 (25-50  $\mu\text{M}$ , 2  $\mu\text{L}$  of the fresh solution) in 398  $\mu\text{L}$  of DMEM for 30 minutes. Cells were then washed twice with 400  $\mu\text{L}$  of DMEM and incubated with the mixture of propargyl alcohol (**2**) (200  $\mu\text{M}$ ) and anthracenyl azide (**1**) (100  $\mu\text{M}$ ) in 400  $\mu\text{L}$  of DMEM for 1 hour. Prior to lisation, the samples were washed with 400  $\mu\text{L}$  of DMEM followed by two washes with PBS (400  $\mu\text{L}$ ). Then 200  $\mu\text{L}$  of a solution of 80% of MeOH in water were added to each well. After 5 min and pipetting up they were transferred to a microplate of 96 well.

### 3. Calibration

Calibration experiments were performed in a 96 wells plate by addition of increasing quantities of a fresh solution of 1-(9-anthracenylmethyl)-1H-1,2,3-triazole-4-methanol **3** (5mM in DMSO) in a solution of 80% of MeOH in water. Higher concentration results in the precipitation of the triazole **3**. The experiments were performed by triplicate, and measured in the fluorescence microplate reader (excitation: 360 nm, emission: 465 nm). The fluorescence results were processed with OriginPro 2016 to obtain the calibration equation and applied to quantify the fluorescence of the experiments in living cells.

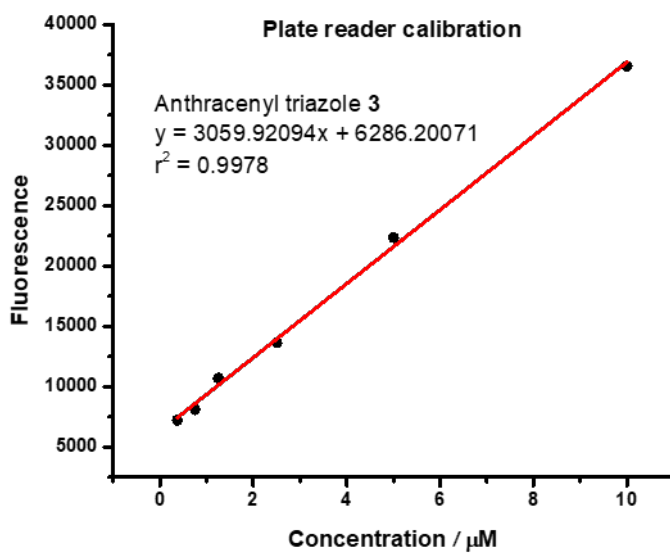

Figure S24. Standard curve of triazole 3. Fluorescence intensity ( $\lambda_{\text{ex}} = 360 \text{ nm}$ ,  $\lambda_{\text{em}} = 465 \text{ nm}$ ) at different concentrations. Linear regression curve for 0–10  $\mu\text{M}$  is shown.

#### 4. Cellular uptake of substrate 1

To calculate the amount of substrate 1 that is internalized by the cell the following experiment was performed:

The experiments were performed in plates of 100 mm as follows:

100000 cells per well were seeded in 100 mm plated two days before treatment with substrate 1. For each measurement, four plates were used.

Cells growing on plate of 100 mm were incubated with the substrate 1 (1.2  $\mu\text{L}$ ) in 4 mL of DMEM for 1 hour. Prior to lysis, the samples were washed with 1 mL of DMEM followed by two washes with PBS (1 mL). Then 1 mL of a solution of 80% of MeOH in water was added. After 5min and pipetting up this solution was transferred to a 1.5 mL Eppendorf. Finally, we obtained 4 mL of lysates from the four plates we used. To 982.6  $\mu\text{L}$  of this sample was added 17.4  $\mu\text{L}$  of a stock solution of coumarin 50 mM as internal standard. The sample (10  $\mu\text{L}$ ) was injected in the HPLC-UV. Method: H<sub>2</sub>O/MeCN gradient 95/5  $\rightarrow$  5/95 in 12 min, then 3 min 100% MeCN.

The calibration of azide 1 was performed in the same HPLC vial, using MeCN as solvent. The different samples were prepared from a 5 mM fresh stock solution of the analyte in DMSO. Coumarine (870  $\mu\text{M}$  as final concentration) was used as internal standard. The areas obtained from the chromatogram were processed with OriginPro 2016 to obtain the calibration equation and applied to quantify the absorbance of the in vitro experiments. No differences were appreciated when MeOH or MeCN were used as solvent.

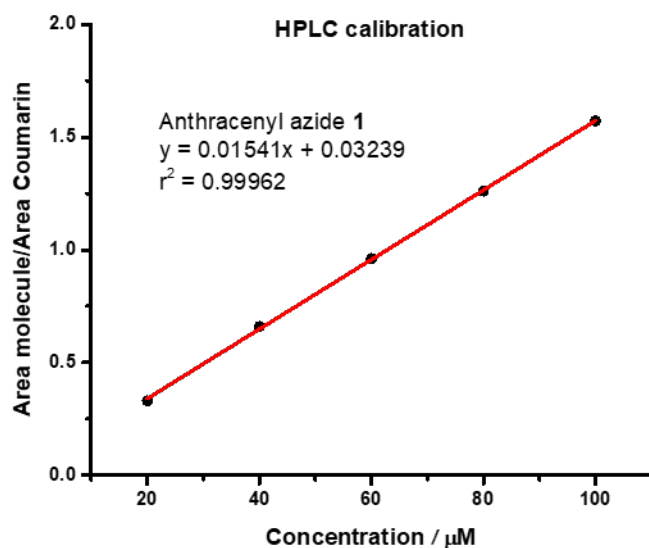

Figure S25. Standard curve of azide 1. Linear regression curve for 0-100  $\mu\text{M}$  is shown.

To normalize the results, number of cells was measured after the experiments were performed. For this, after the incubation time, cells were washed twice with 1 mL of PBS, harvested with 1 mL of trypsin/EDTA for 5 min at 37 °C and resuspended in 3 mL of DMEM buffer. An aliquot of 50  $\mu\text{L}$  was transferred to an 0.500 mL Eppendorf and diluted with 450  $\mu\text{L}$  of PBS. Then cells were measured with *Scepter™ 2.0 Handheld Automated Cell Counter*.

**EXAMPLE:**

Number of cells per well in experiments with copper complexes: 428300 cells/mL in 0.4 mL (171320 cells per well)

Uptake of substrate by 2522000 cells/mL in 4 mL: 15 % (59  $\mu\text{M}$  out of 400  $\mu\text{M}$  of the total amount, final concentration of limiting substrate inside cells: 15  $\mu\text{M}$ ).

| Catalyst               | FI    | Product formation ( $\mu\text{M}$ ) | Product formation/cell ( $\mu\text{M}/\text{cell}$ ) | Yield |
|------------------------|-------|-------------------------------------|------------------------------------------------------|-------|
| L3 (50 $\mu\text{M}$ ) | 6483  | 0.41                                | 2.39E-06                                             | 2.7%  |
| C5 (50 $\mu\text{M}$ ) | 14590 | 2.71                                | 1.58E-05                                             | 18%   |
| C5 (25 $\mu\text{M}$ ) | 11075 | 1.57                                | 9.16-06                                              | 10.4% |



### S13.- References

- (1) Mummidivarapu, V. V. S.; Hinge, V. K.; Samanta, K.; Yarramala, D. S.; Rao, C. P. *Chem. Eur. J.* **2014**, *20*, 14378.
- (2) Hsieh, Y. C.; Chir, J. L.; Wu, H. H.; Chang, P. S.; Wu, A. T. *Carbohydr. Res.* **2009**, *344*, 2236.
- (3) Del Amo, D. S.; Wang, W. *J. Am. Chem. Soc.* **2010**, *132*, 16893.
- (4) Besanceney-Webler, C.; Jiang, H.; Zheng, T.; Feng, L.; Del Amo, D. S.; Wang, W.; Klivansky, L. M.; Marlow, F. L.; Liu, Y.; Wu, P. *Angew. Chem. Int. Ed.* **2011**, *50*, 8051.
- (5) Tomás-Gamasa, M.; Martínez-Calvo, M.; Couceiro, J. R.; Mascareñas, J. L. *Nat. Commun.* **2016**, *7*, 1.
- (6) Lal, S.; McNally, J.; White, A. J. P.; Díez-González, S. *Organometallics* **2011**, *30*, 6225.
- (7) Díez-González, S.; Nolan, S. P. *Angew. Chem. Int. Ed.* **2008**, *47*, 8881.
- (8) Haldón, E.; Delgado-Rebollo, M.; Prieto, A.; Álvarez, Maya, C.; Nicasio, M. C.; Pérez, P. J. *Inorg. Chem.* **2014**, *53*, 4192.
